# Supplementary material for: Crocetin antagonizes parthanatos in ischemic stroke via inhibiting NOX2 and preserving mitochondrial hexokinase-I
Source: PubMed Central journal article supplement (PMC9867762; doi:10.1038/s41419-023-05581-x), 2023-01-21

**Fig.1**

Ctrl. MCAO, MCAO+crocic(20, 40 mg/kg).

**E**

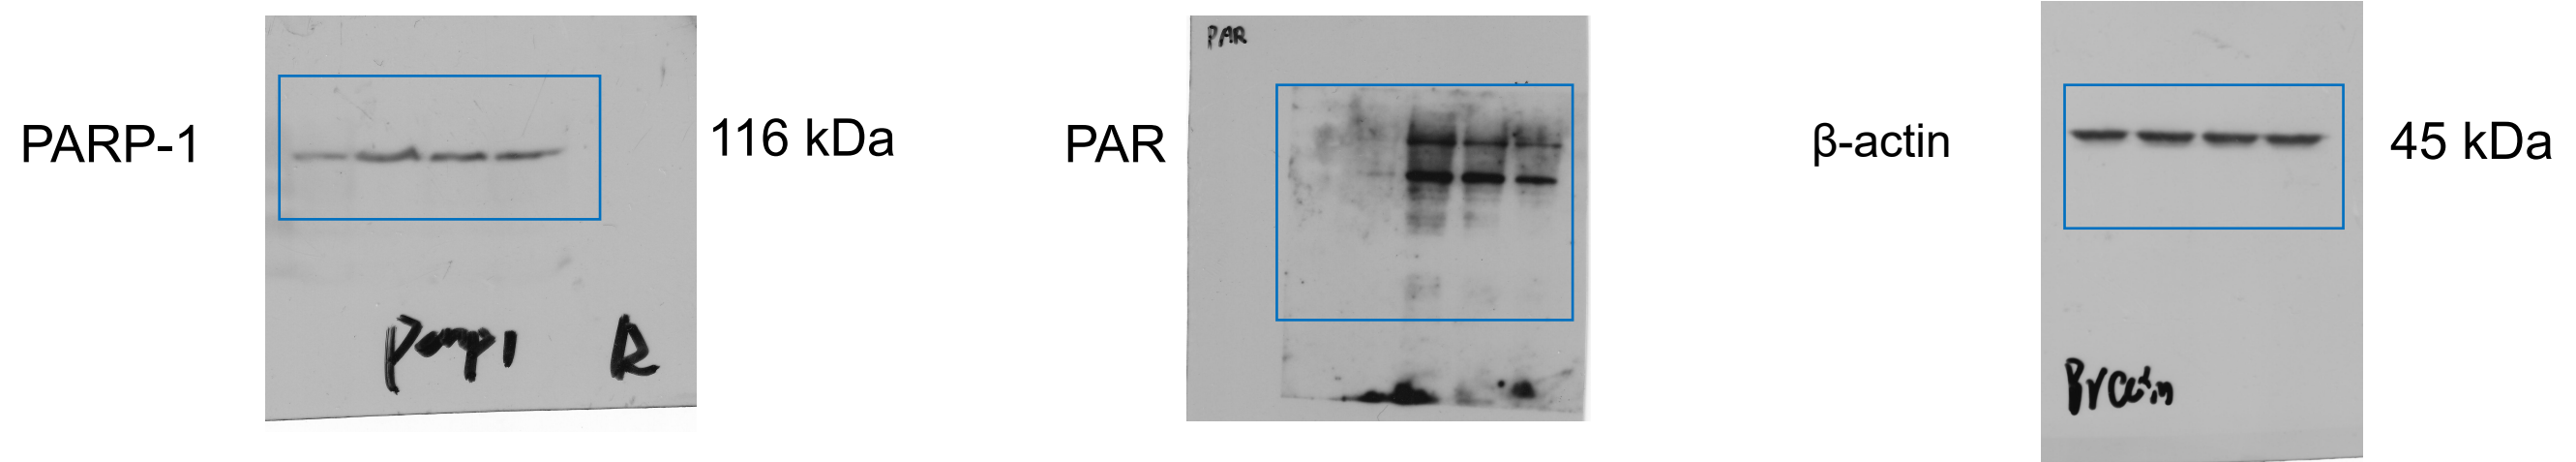

**H**

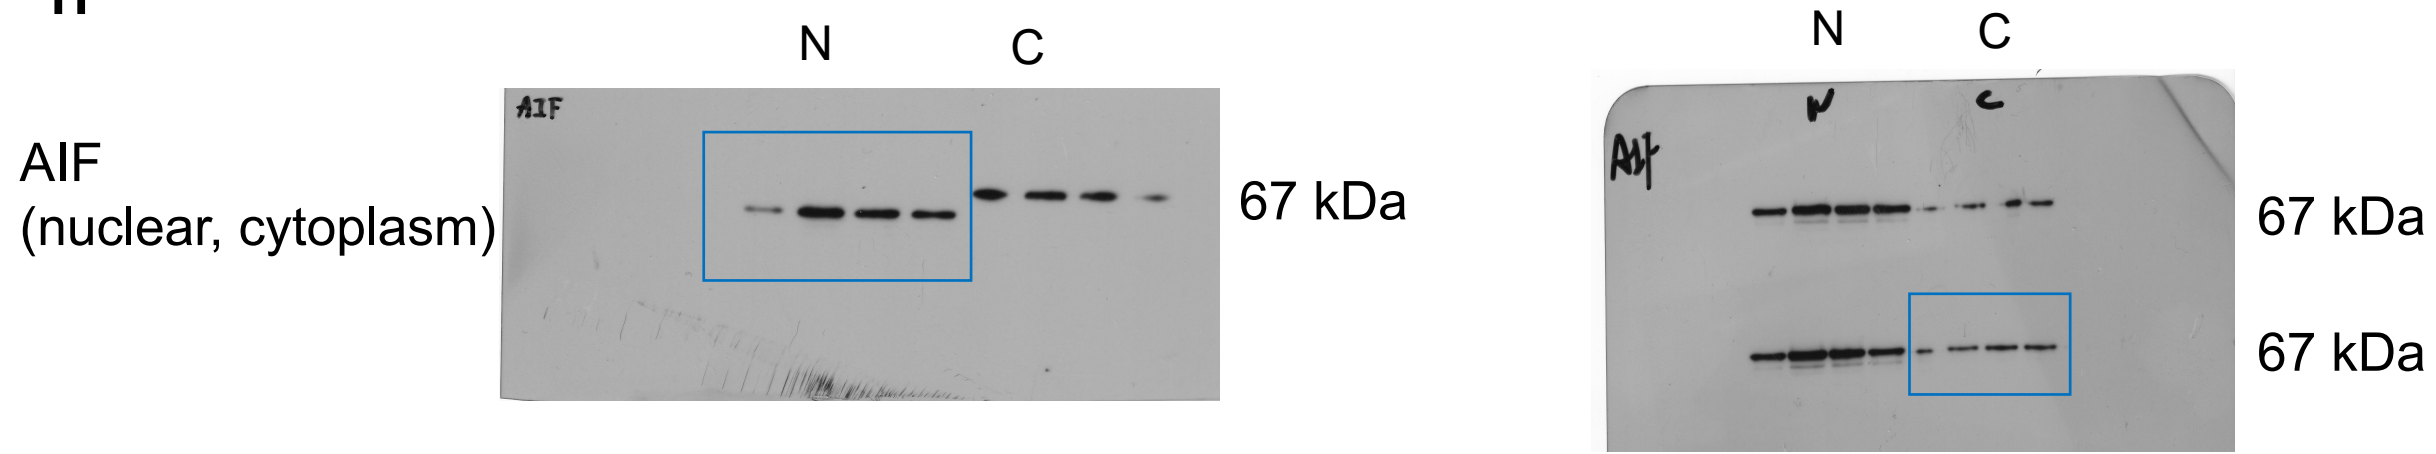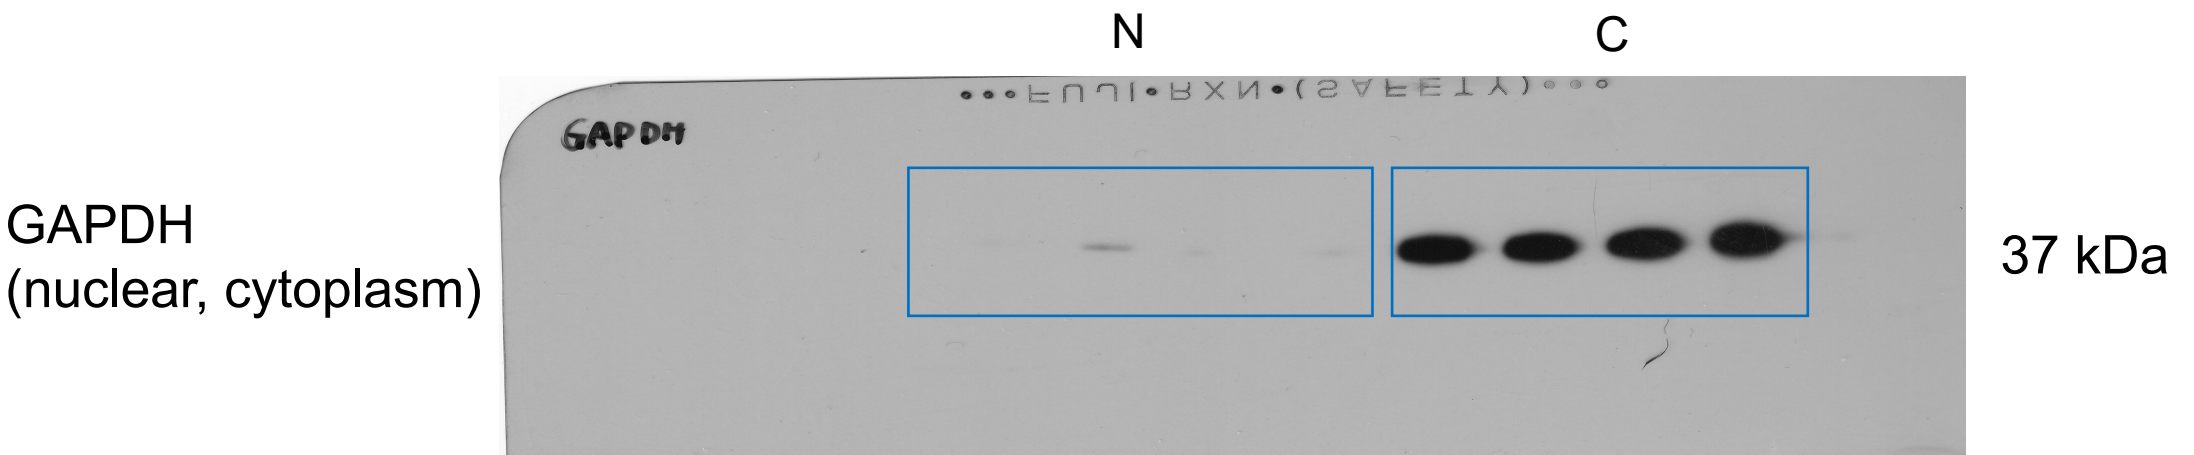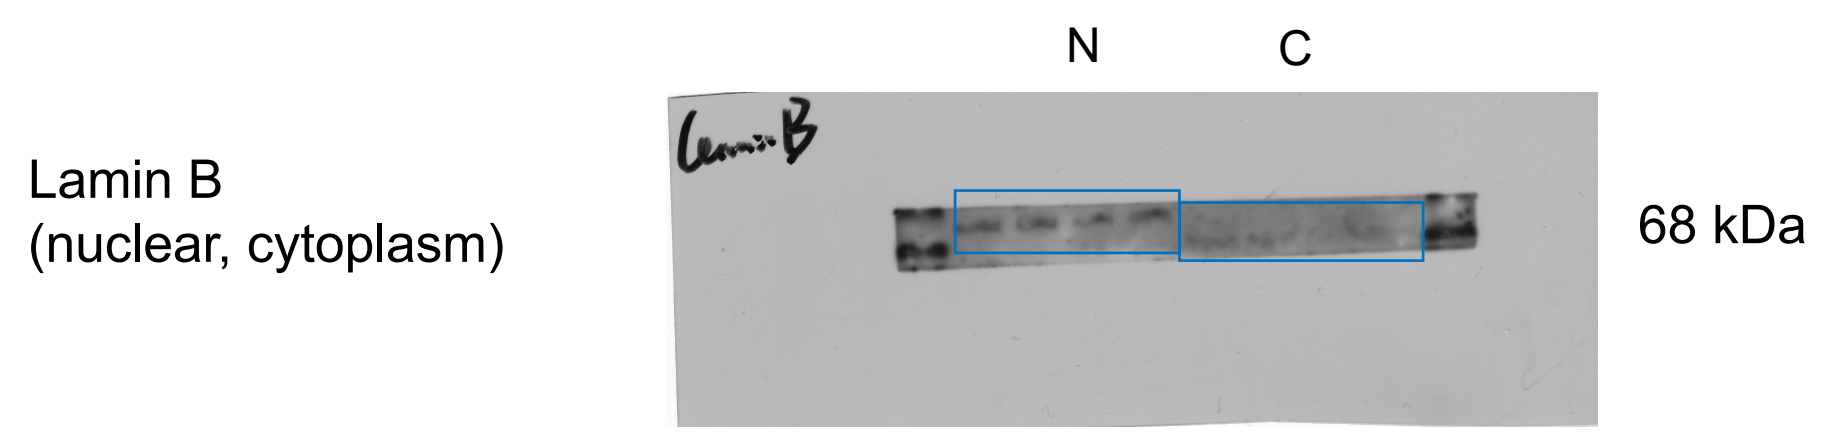

**Fig.2**

Ctrl, OGD. OGD+crocetin (5, 10, 25  $\mu$ M), OGD+PJ34

**D**

PARP-1

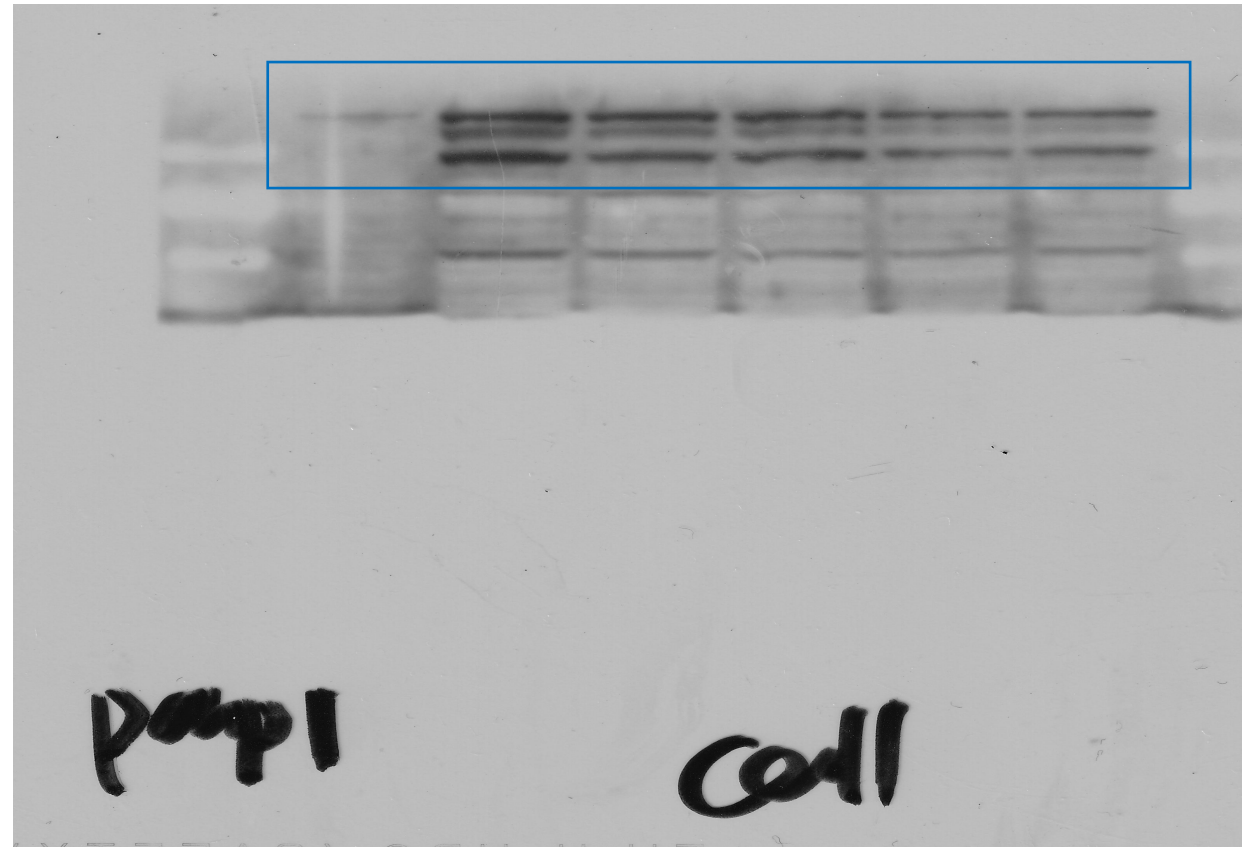

116 kDa

$\beta$ -acint

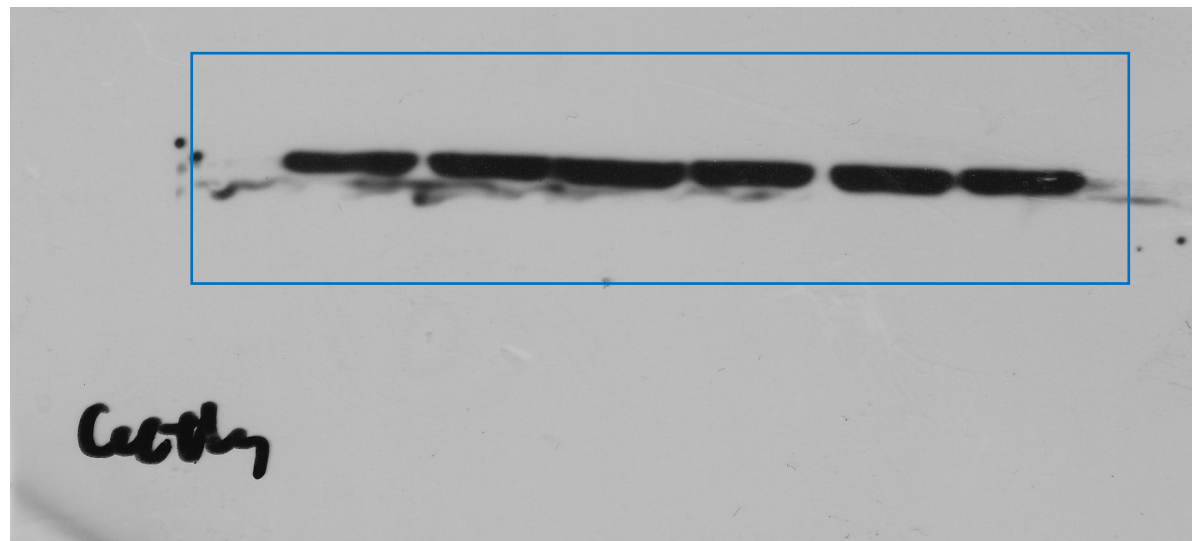

45 kDa

**Fig.3**

Ctrl, NMDA. NMDA+crocetin (5, 10, 25  $\mu$ M)

**D**

PARP-1

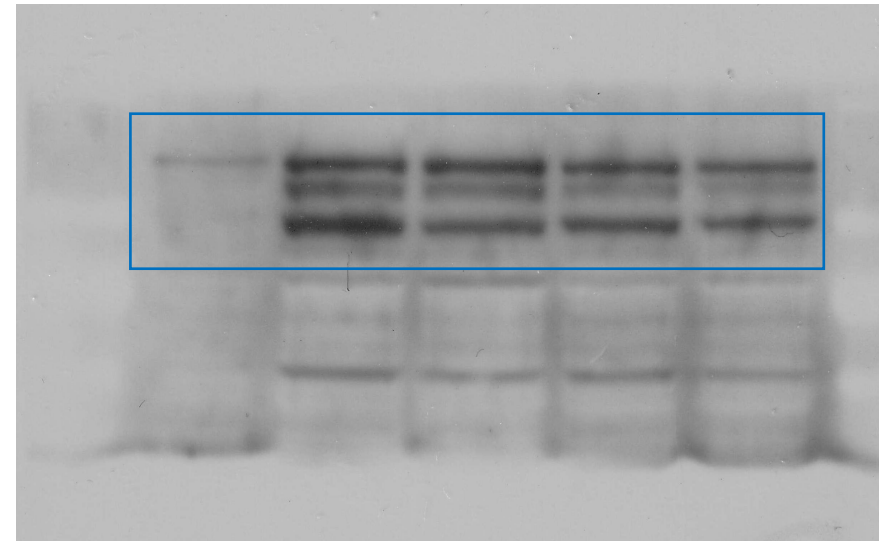

116 kDa

PAR

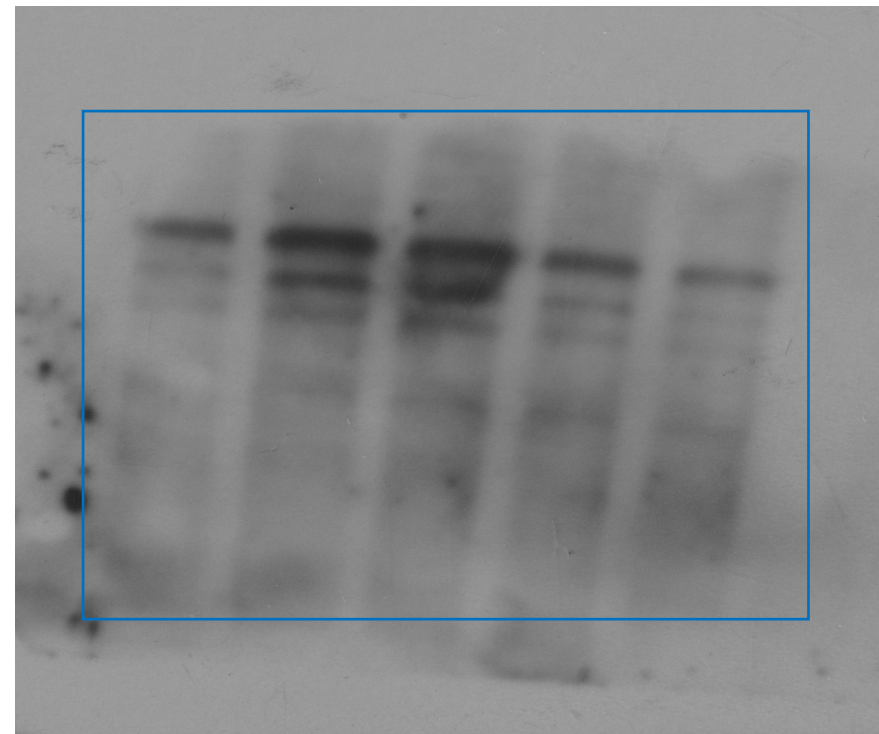

$\beta$ -actin

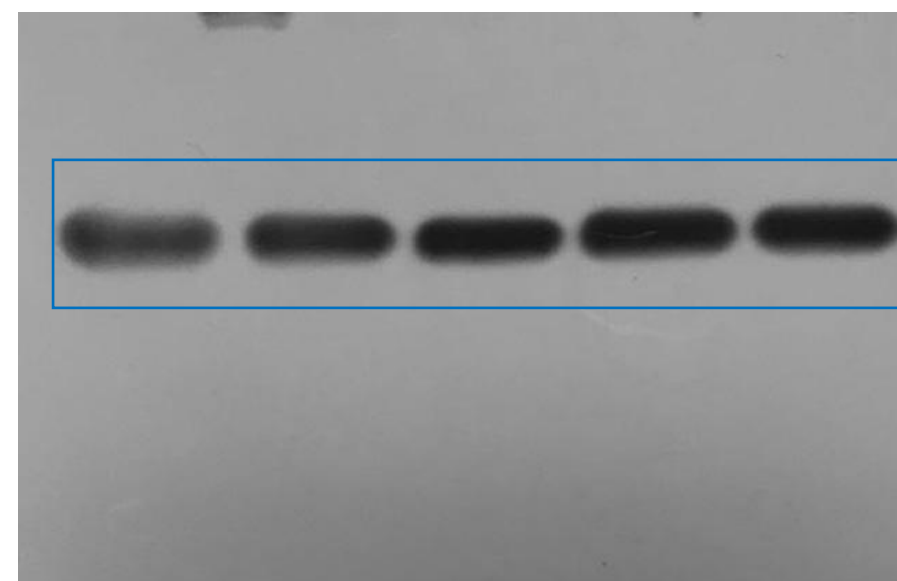

45 kDa

**Fig. 4**

Ctrl, MNNG. MNNG+crocetin (25, 50, 100  $\mu$ M)

**D**

Caspase-3

cleaved-  
Caspase-3

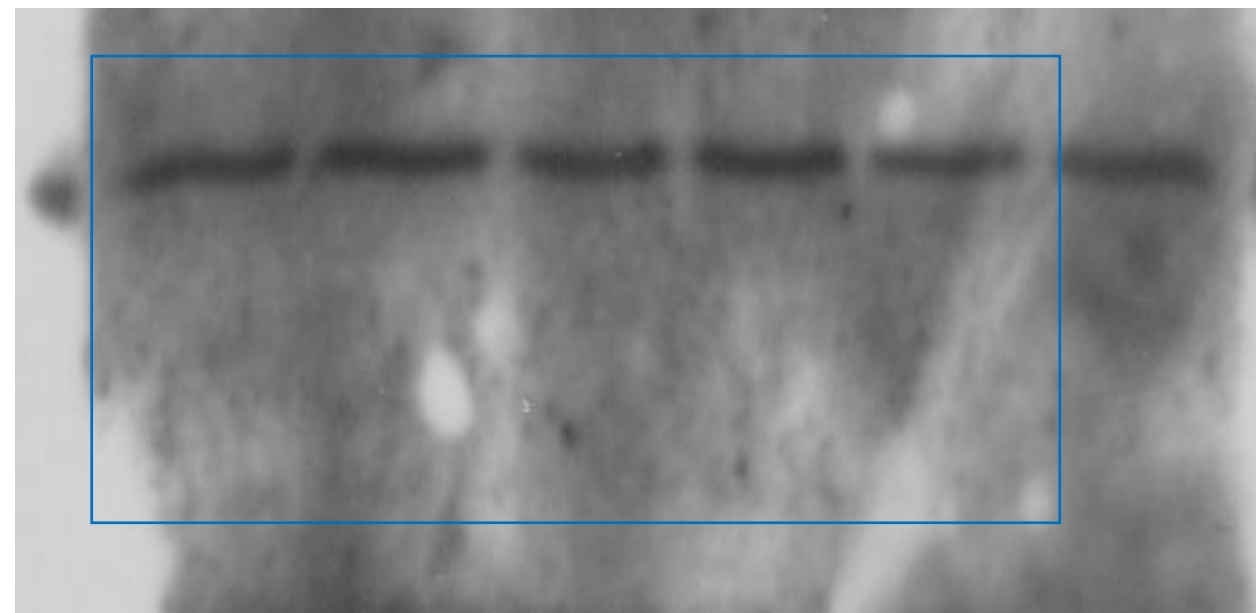

35 kDa

17 kDa

15 kDa

$\beta$ -actin

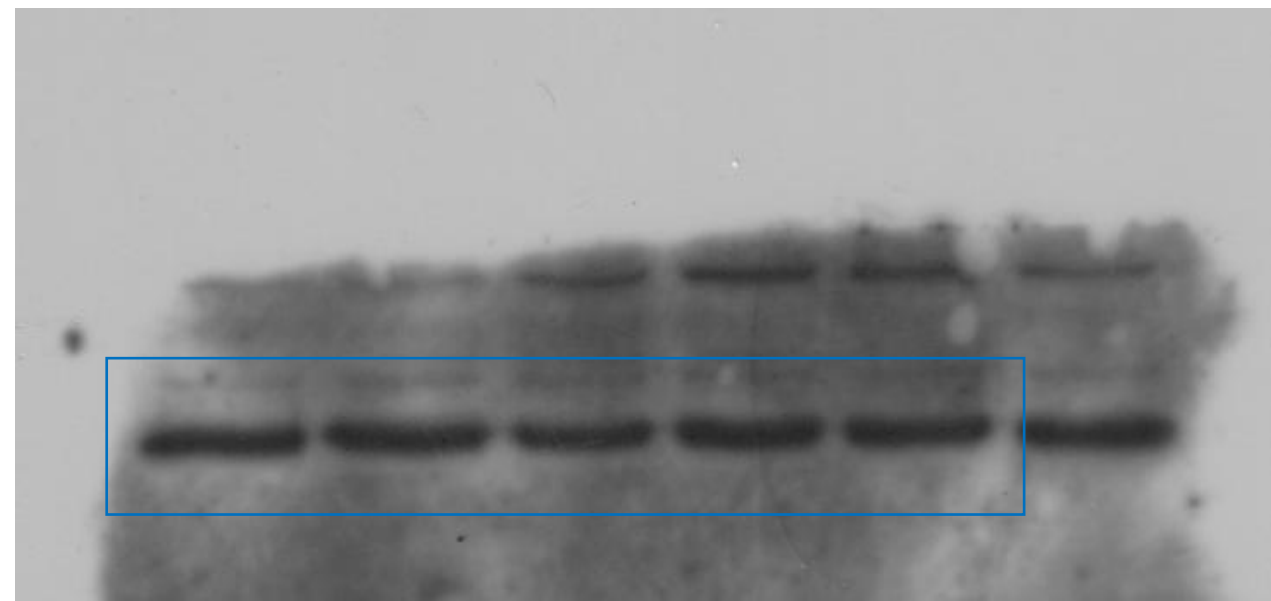

45 kDa



Fig. 5

H

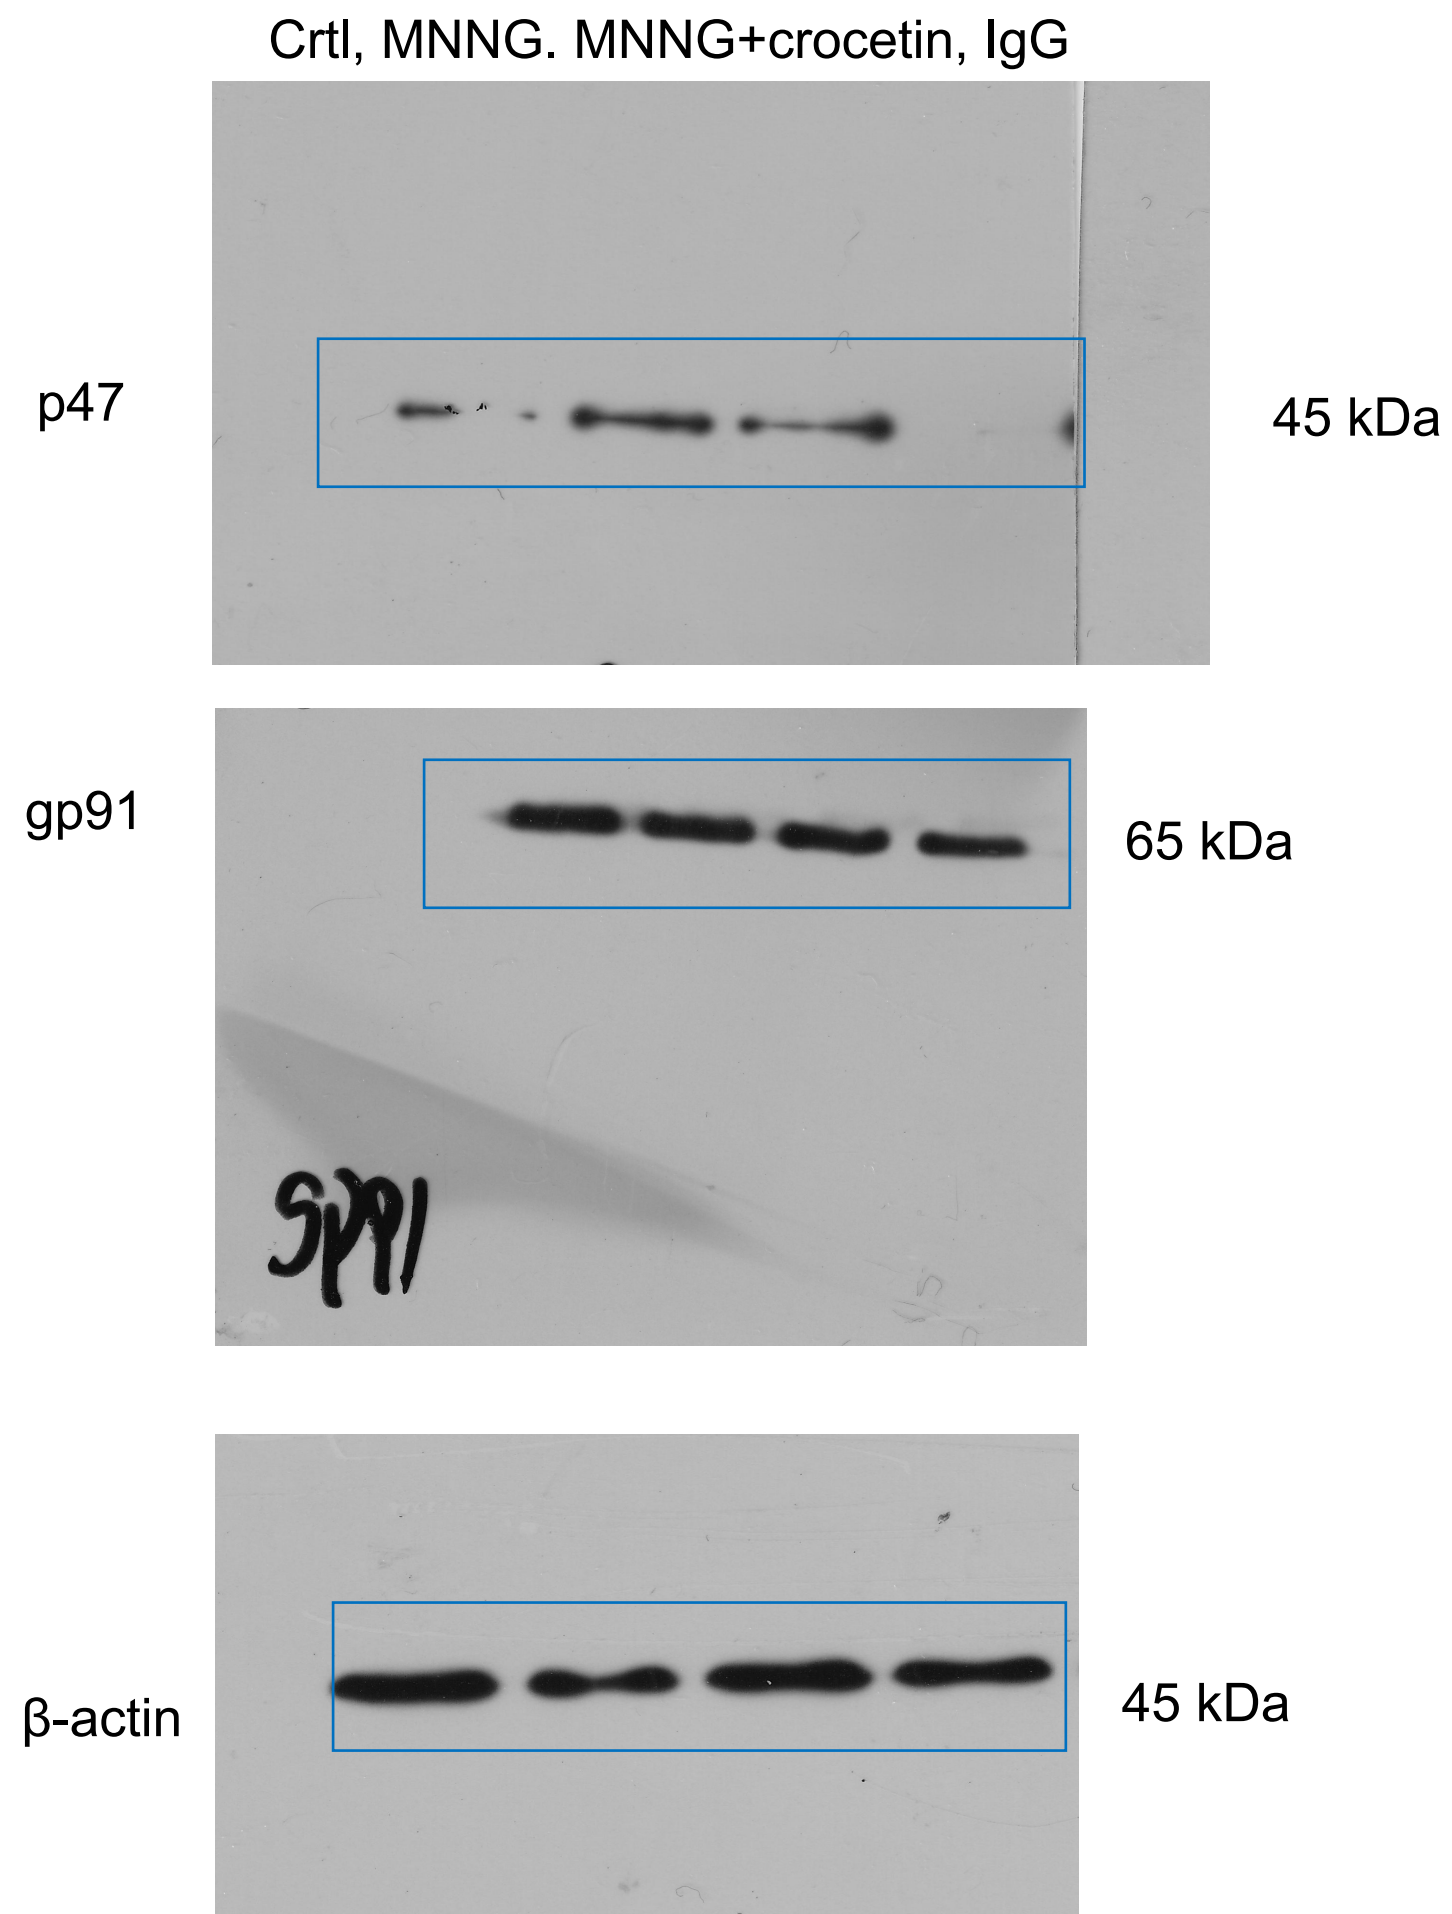

I

Ctrl, MNNG, MNNG+crocetin (25, 50, 100  $\mu$ M)

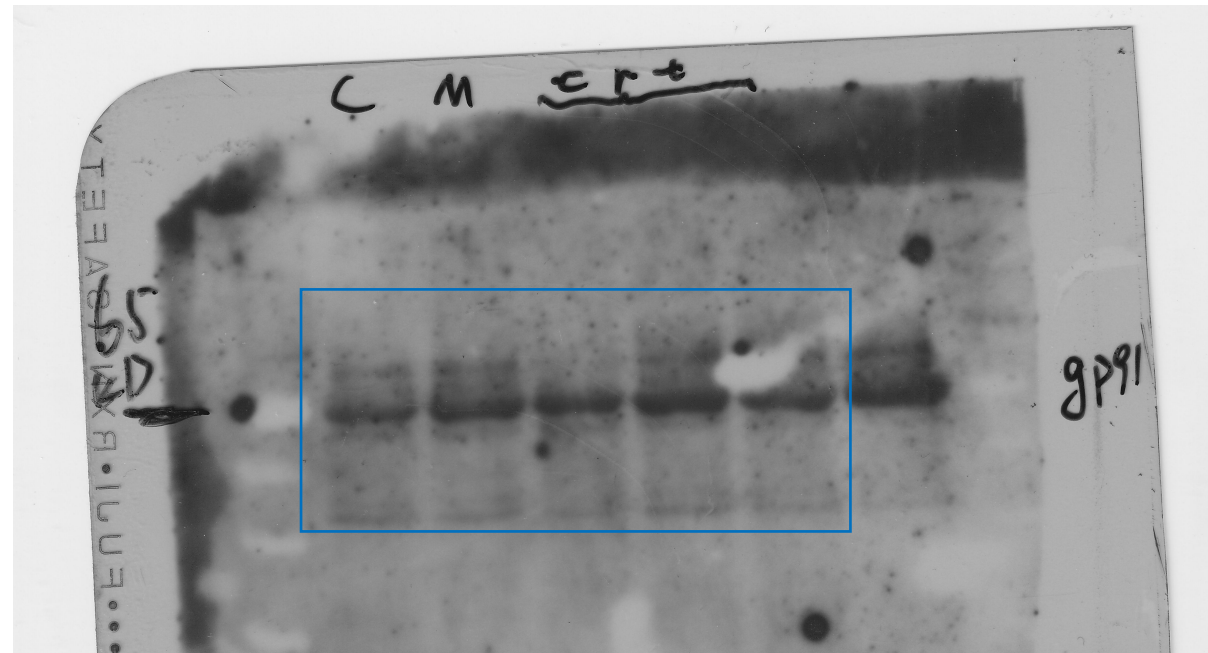

gp91

65 kDa

$\beta$ -actin

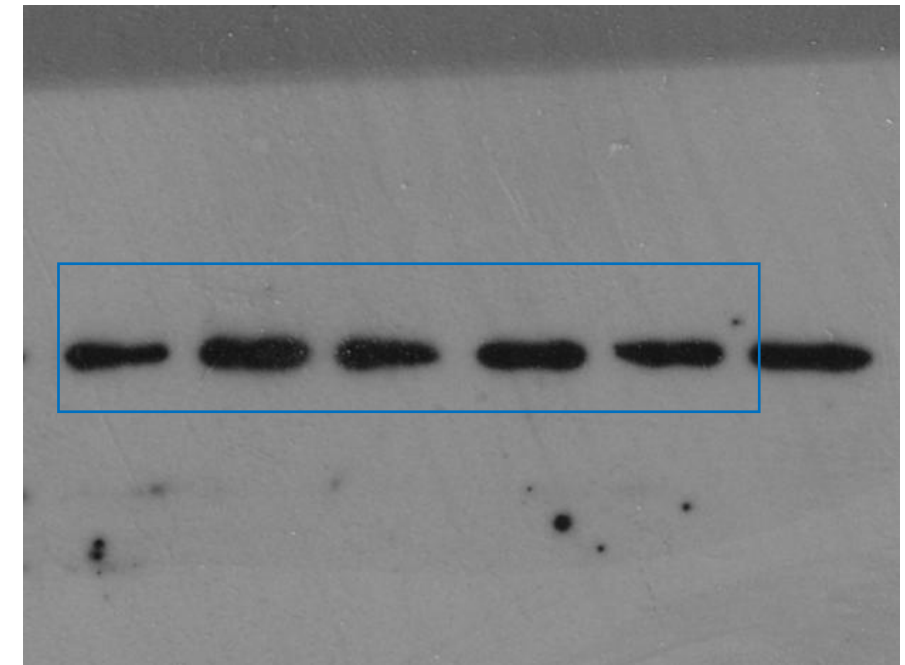

45 kDa

p-p47

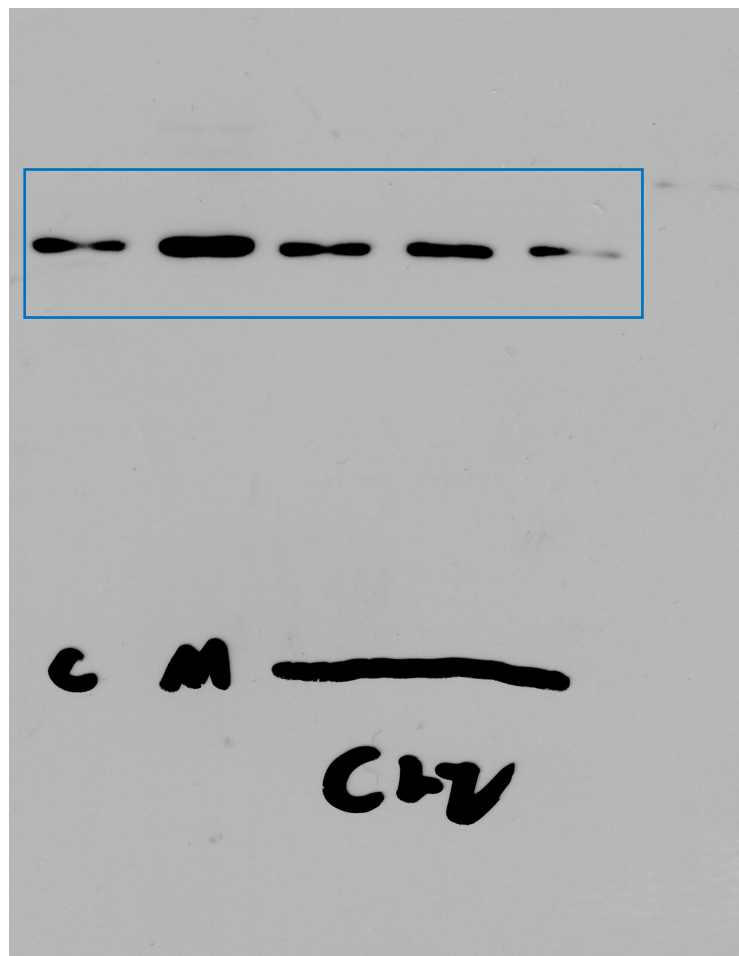

45 kDa

p47

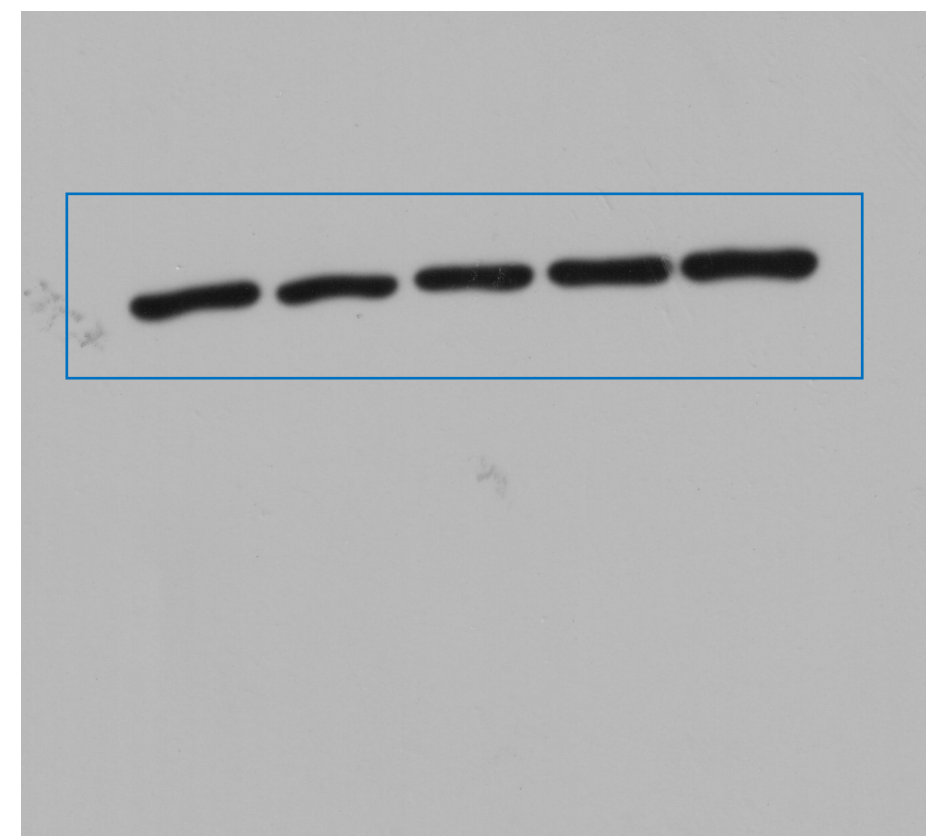

45 kDa

Ctrl, MNNG, MNNG+crocetin (25, 50, 100  $\mu$ M)

p-ERK

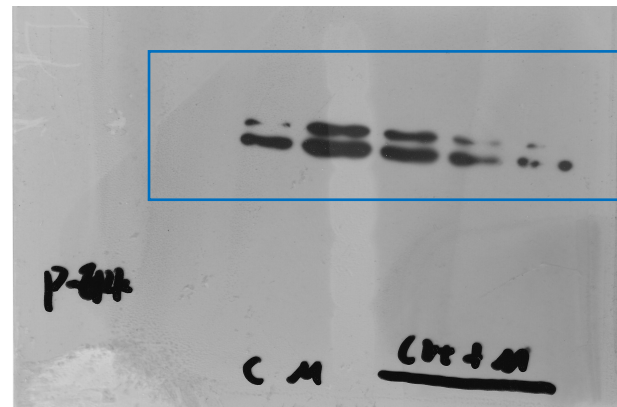

44 kDa  
42 kDa

ERK

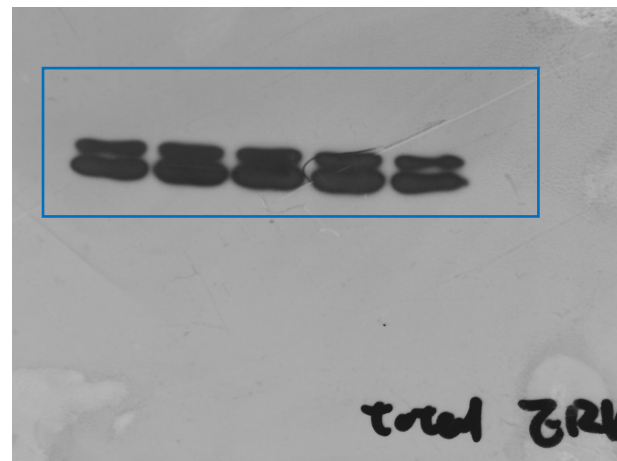

44 kDa  
42 kDa

p-PKC $\zeta$

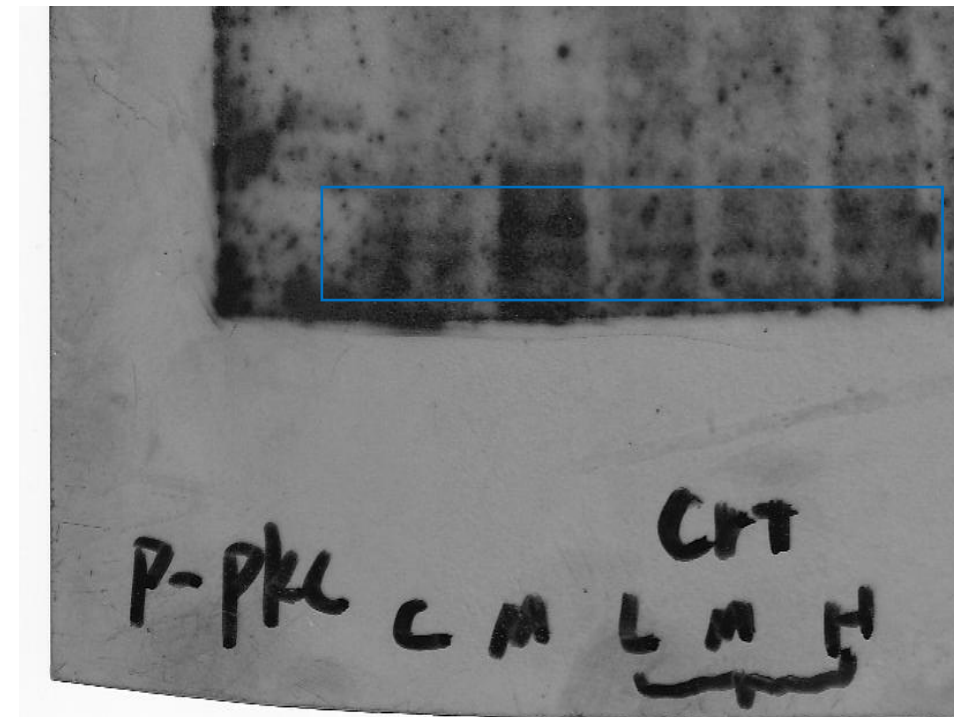

70 kDa

PKC $\zeta$

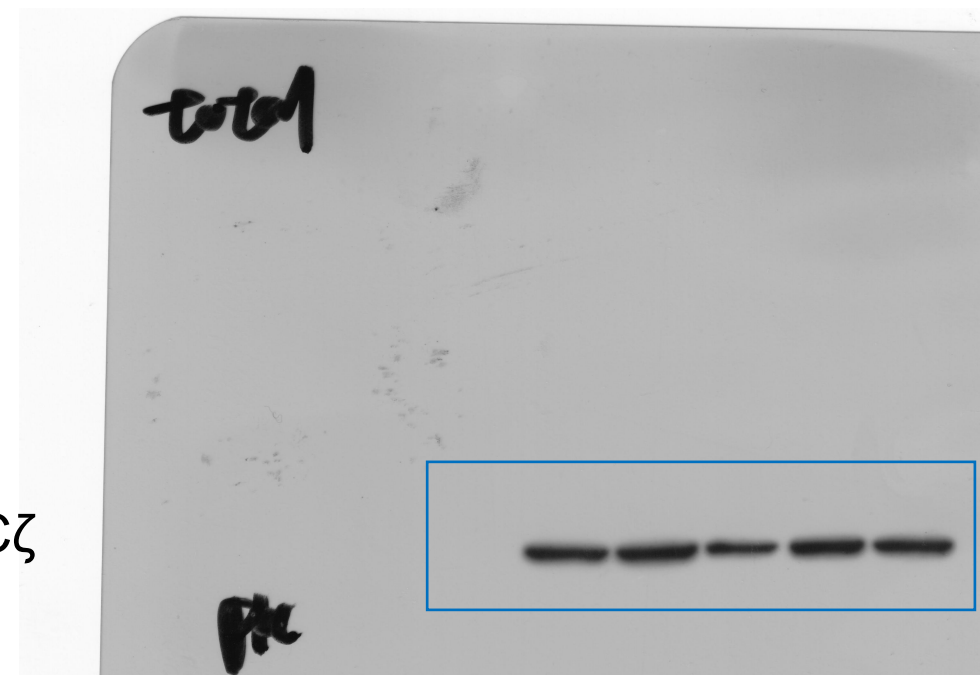

70 kDa



**Fig. 7**

**A**

Ctrl, MNNG. MNNG+crocetin (25, 50, 100  $\mu$ M), MNNG+MG132

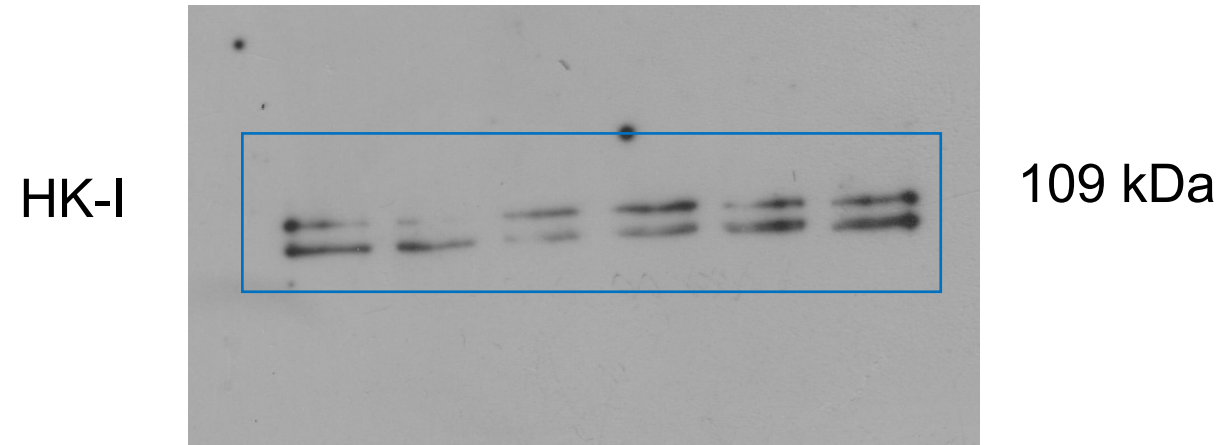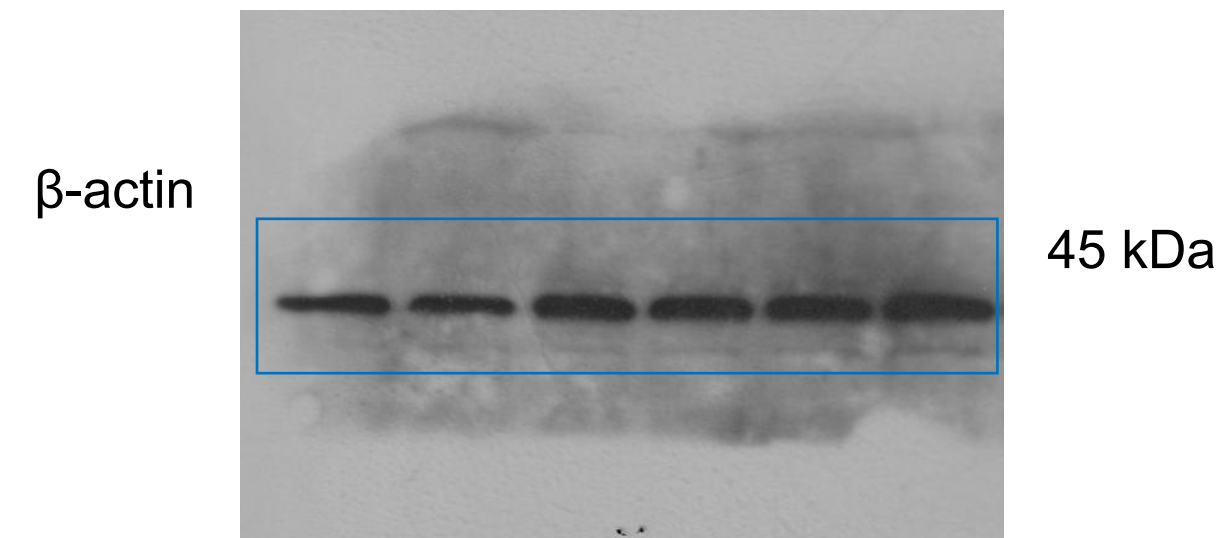

**D**

Ctrl, MNNG. MNNG+crocetin (25, 50, 100  $\mu$ M)

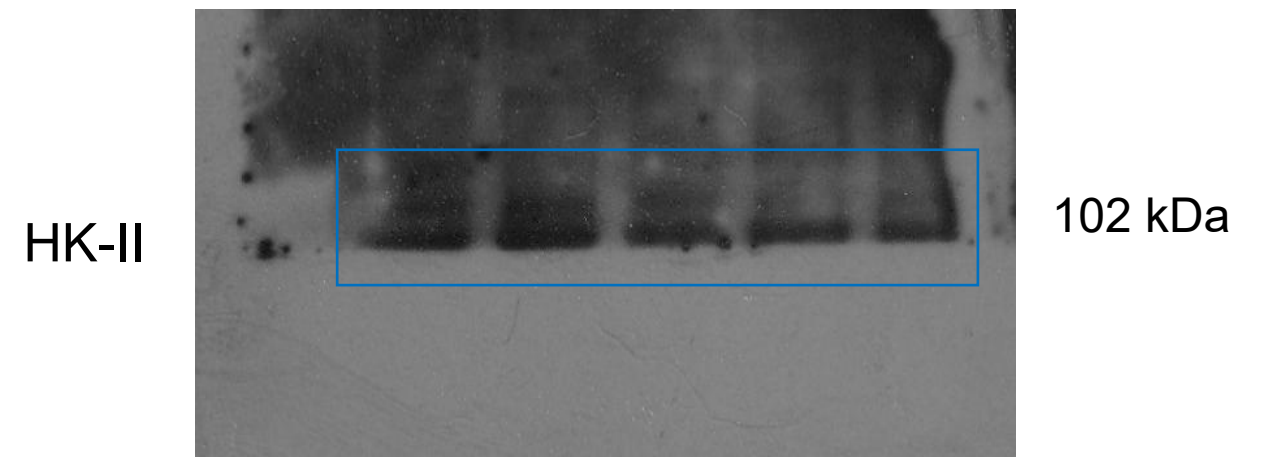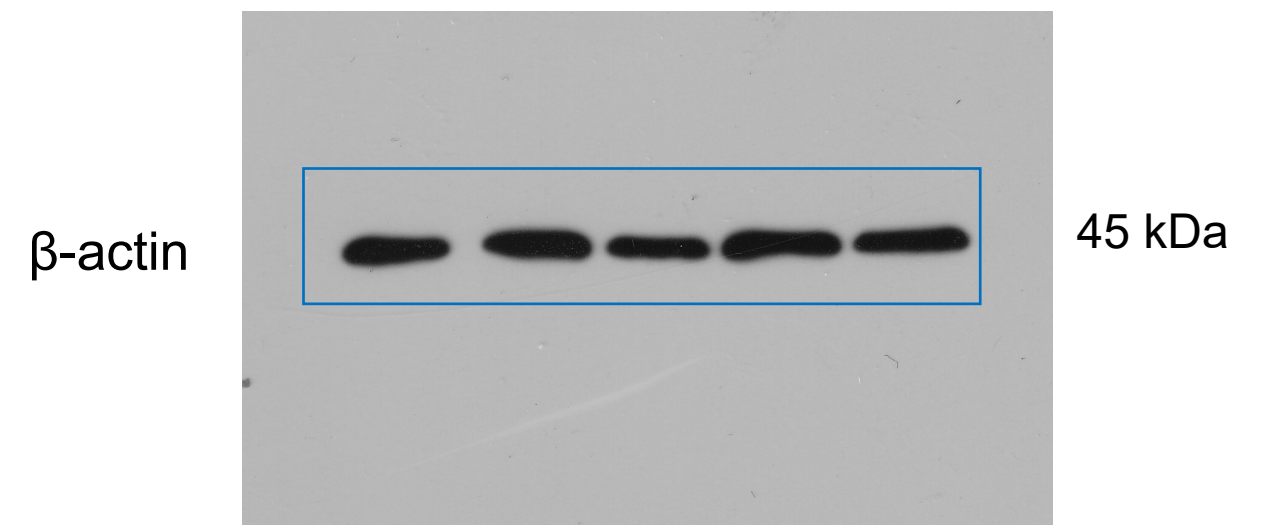



**E** Ctrl, MNNG, MNNG+crocetin (25, 50, 100  $\mu$ M), IgG

PAR

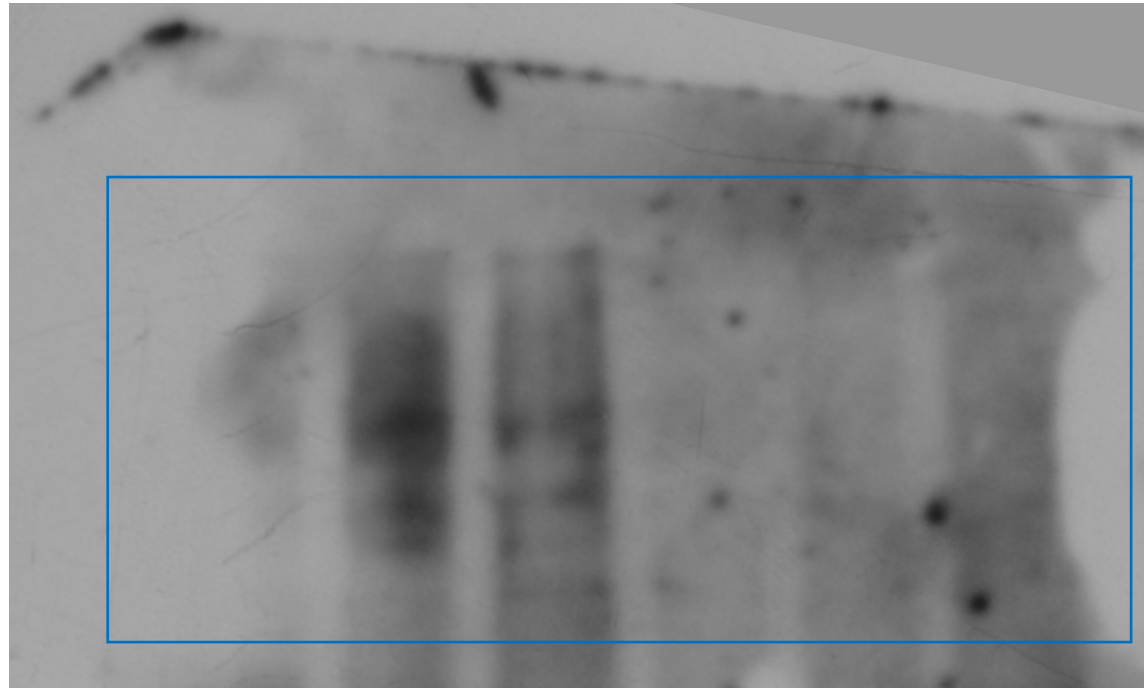

Ub

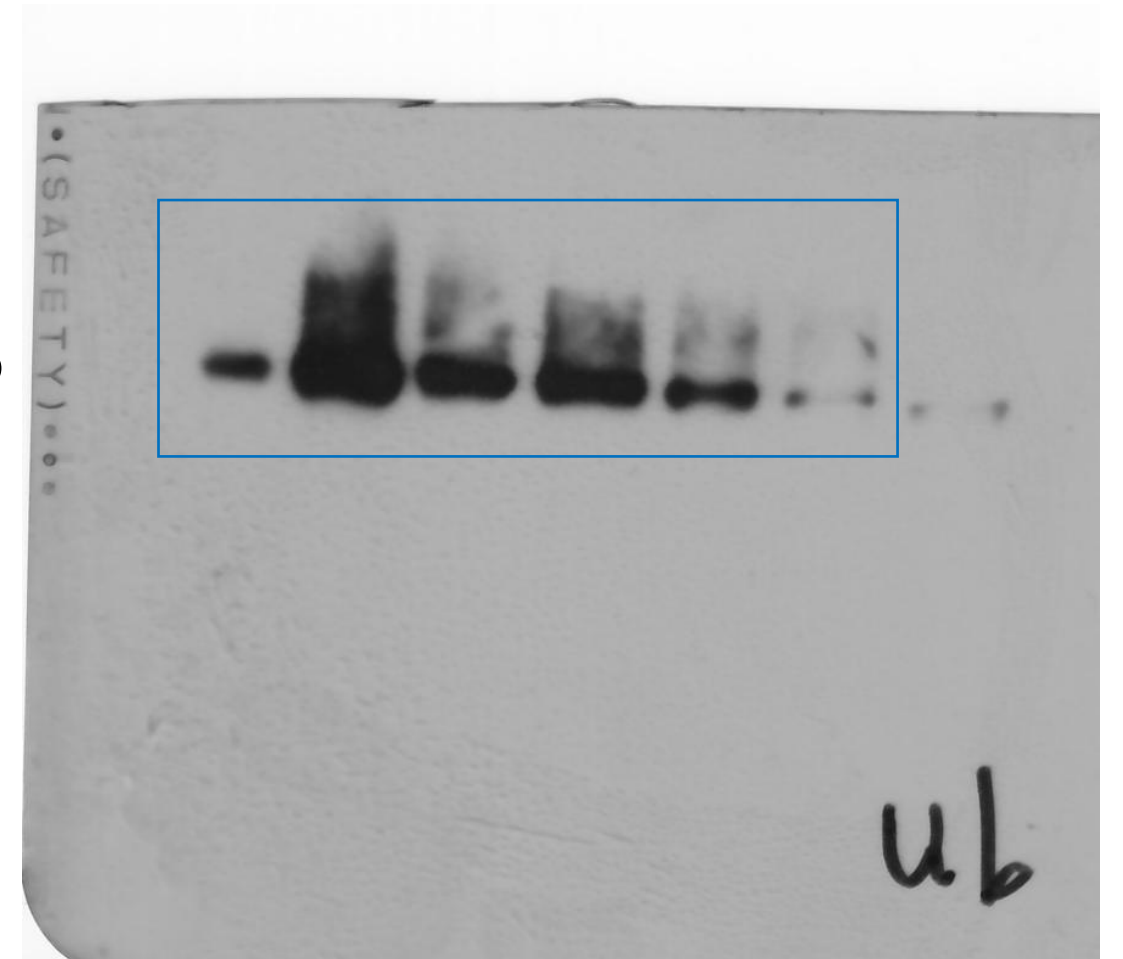

RNF146  
(Iduna)

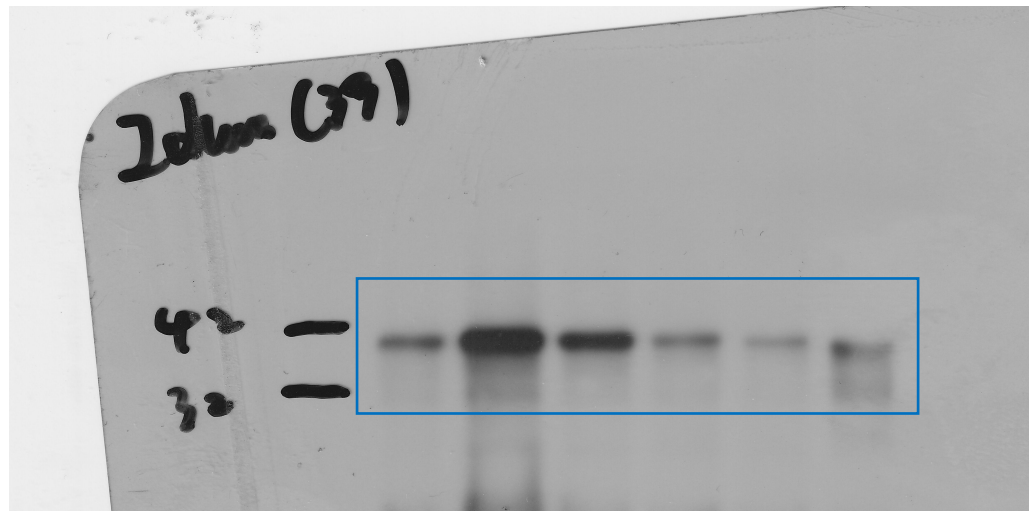

39 kDa

HK-I

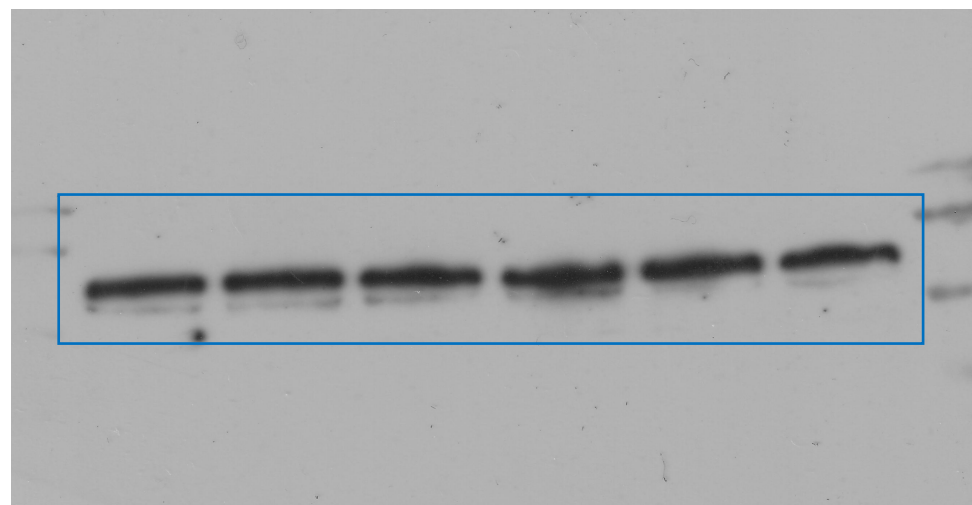

109 kDa

$\beta$ -actin

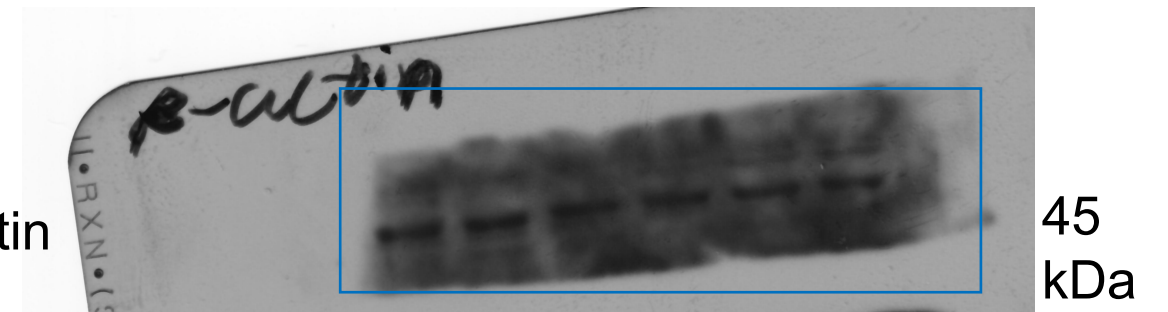

45  
kDa

I

Ctrl, MNNG. MNNG+RNF146 siRNA

HK-I

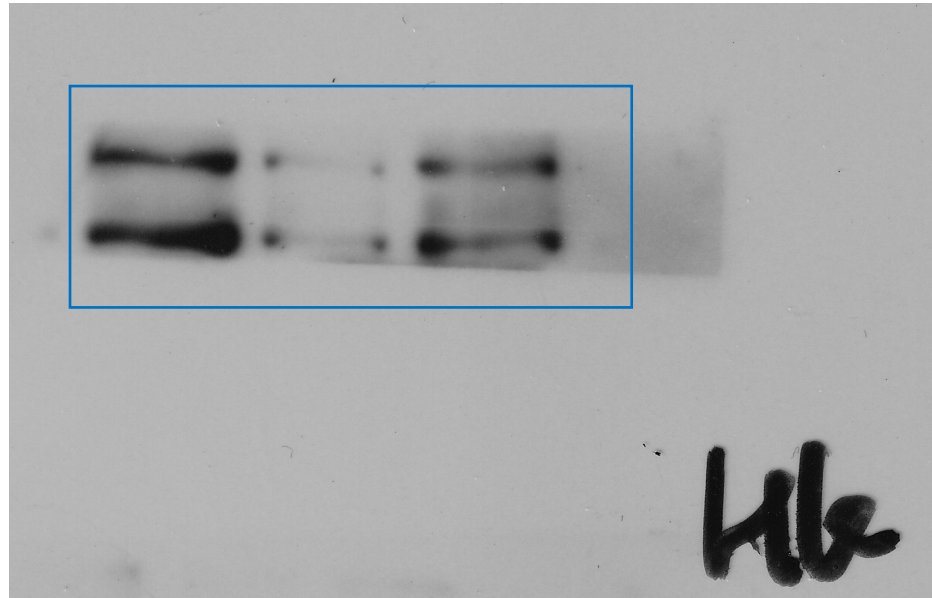

109 kDa

$\beta$ -actin

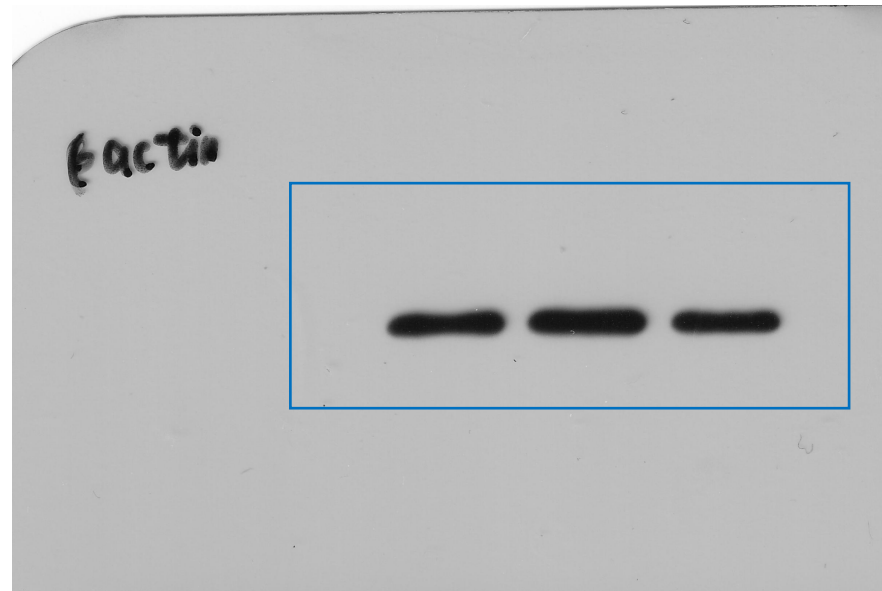

45 kDa

K

Ctrl, MNNG. MNNG+RNF146 siRNA, IgG

Ub

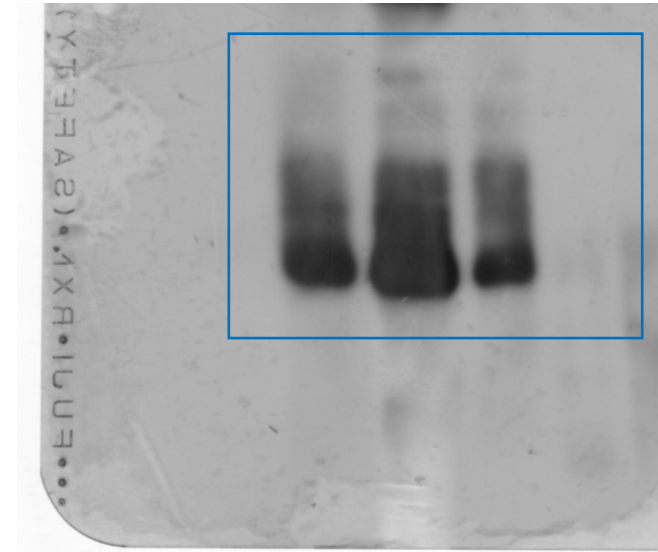

PAR

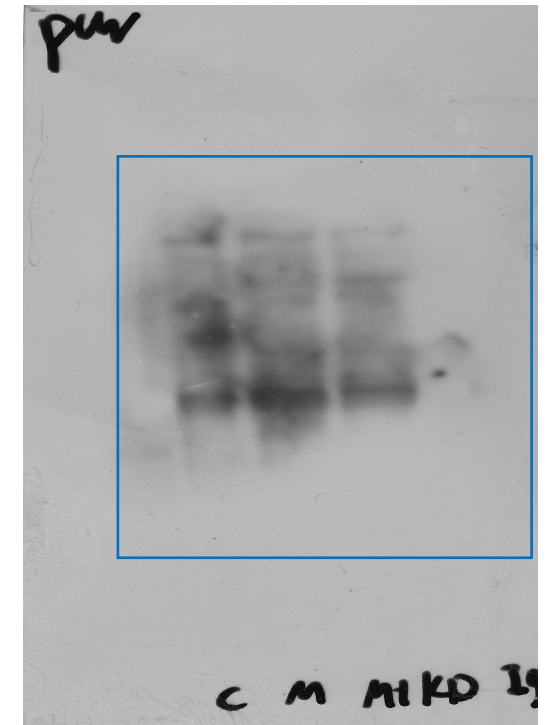

C M MNNG IgG

HK-I

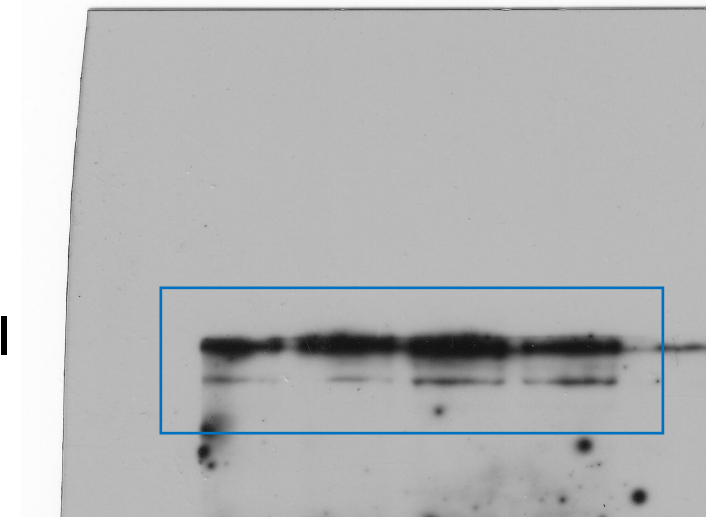

109 kDa

$\beta$ -actin

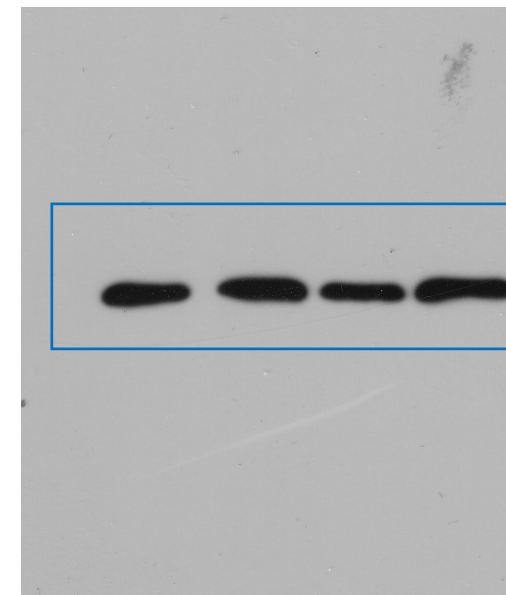

45 kDa

**Fig. 8**

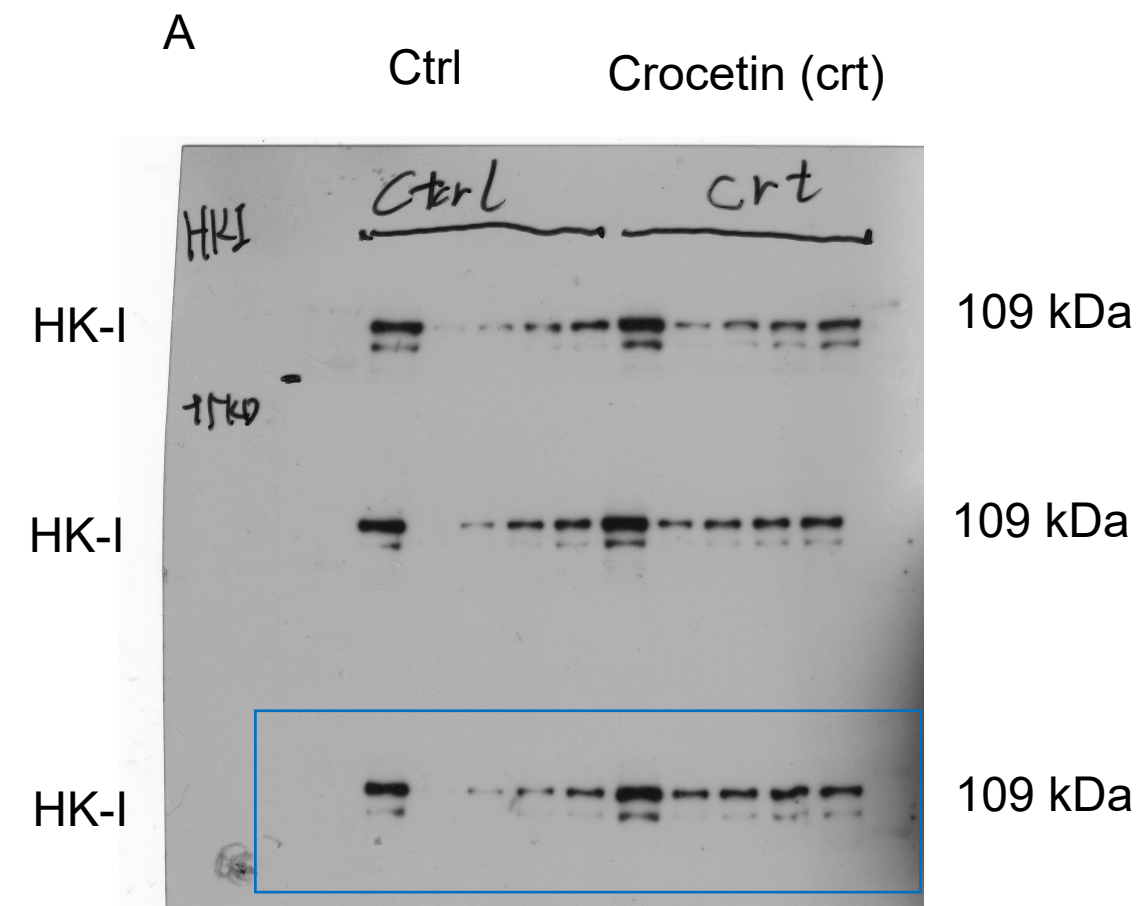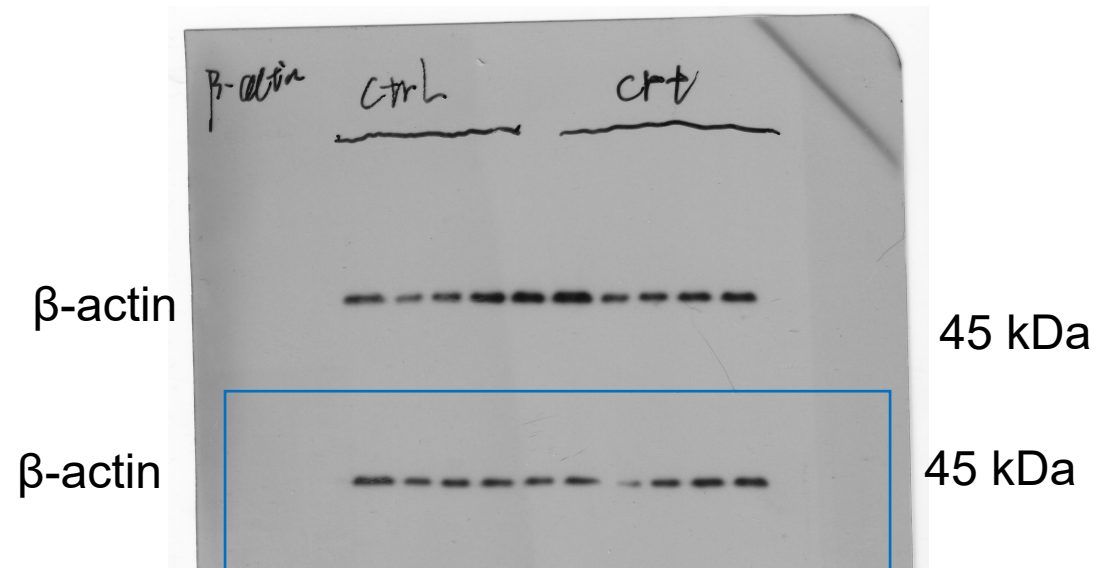

**Fig.S1**

D Ctrl, OGD/R(4h). OGD/R(4h)+crocetin (5, 10, 25  $\mu$ M), OGD/R(4h)+PJ34

PARP-1

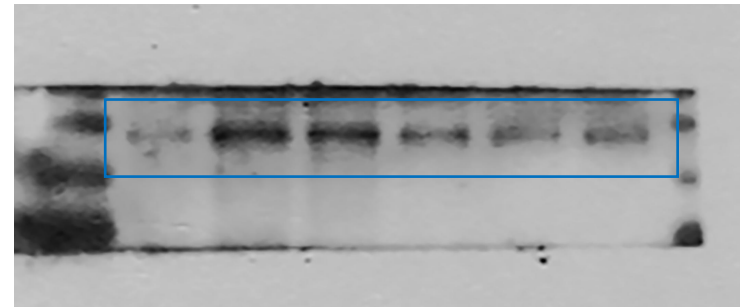

116 kDa

PAR

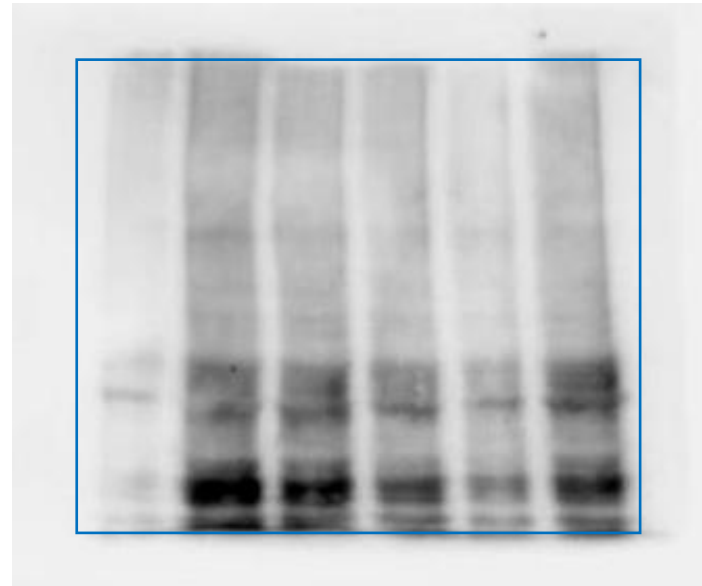

$\beta$ -actin

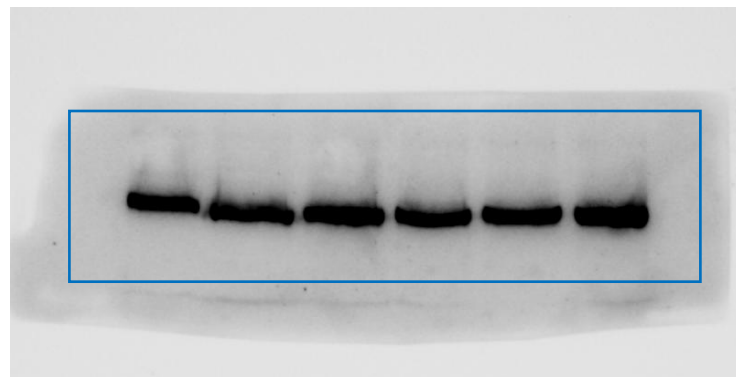

45 kDa



**Fig.S1**

L Ctrl, OGD/R(24h). OGD/R(24h)+crocetin (5, 10, 25  $\mu$ M), OGD/R(24h)+PJ34

PARP-1

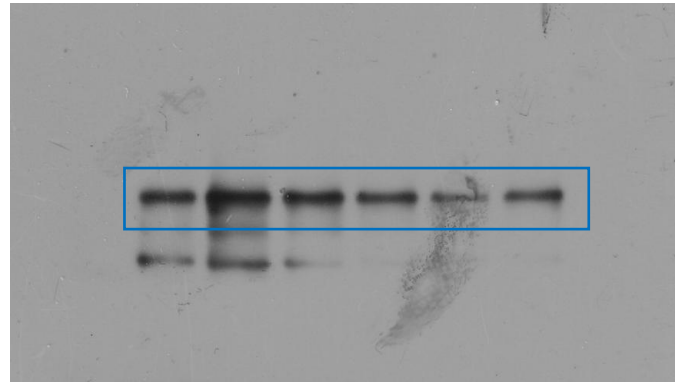

116 kDa

PAR

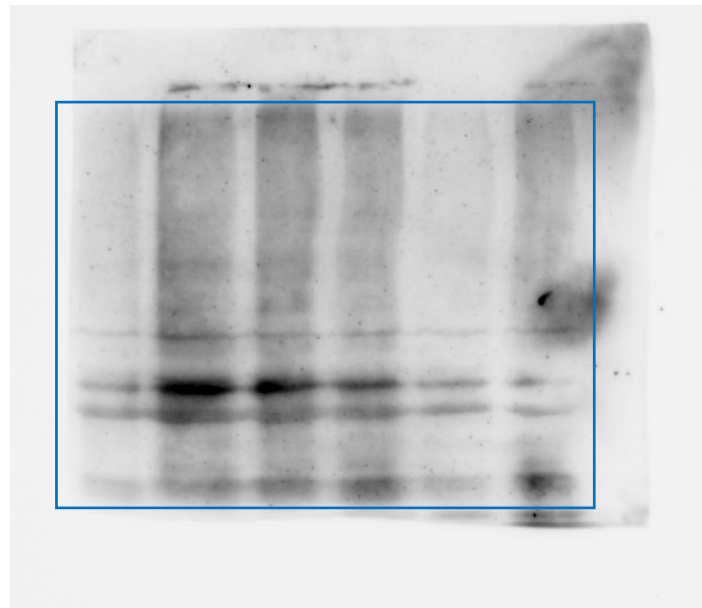

$\beta$ -actin

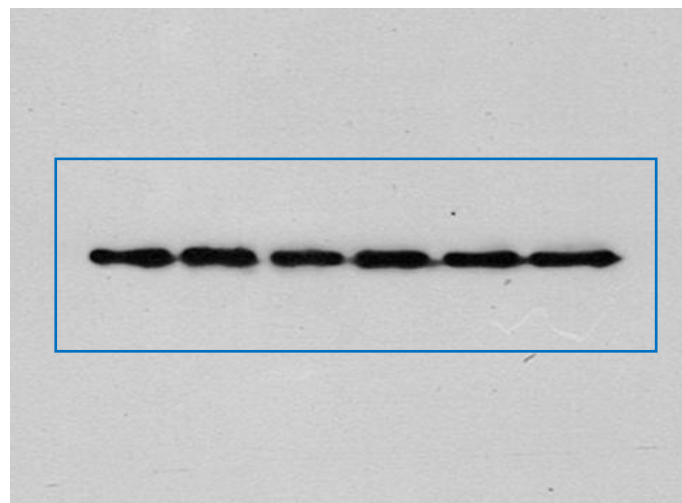

45 kDa

**Fig.S4**

Ctrl. MCAO, MCAO+crocic(20, 40 mg/kg).

A

GPX4

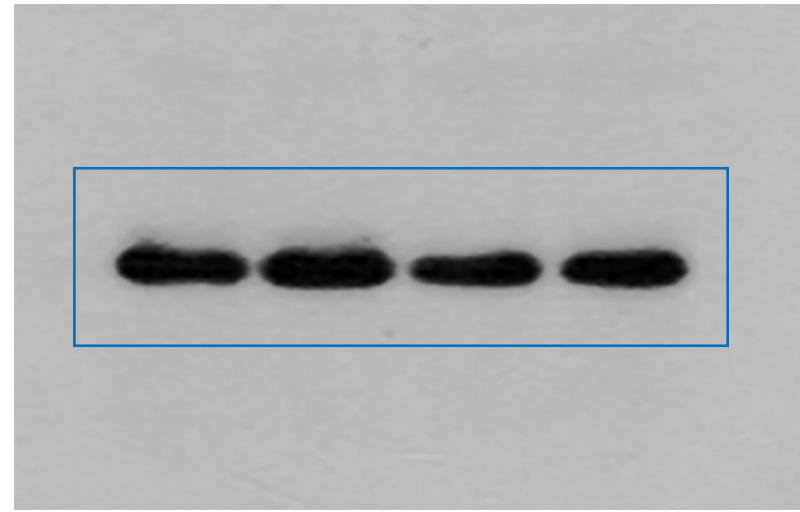

22 kDa

Ferritin heavy chain

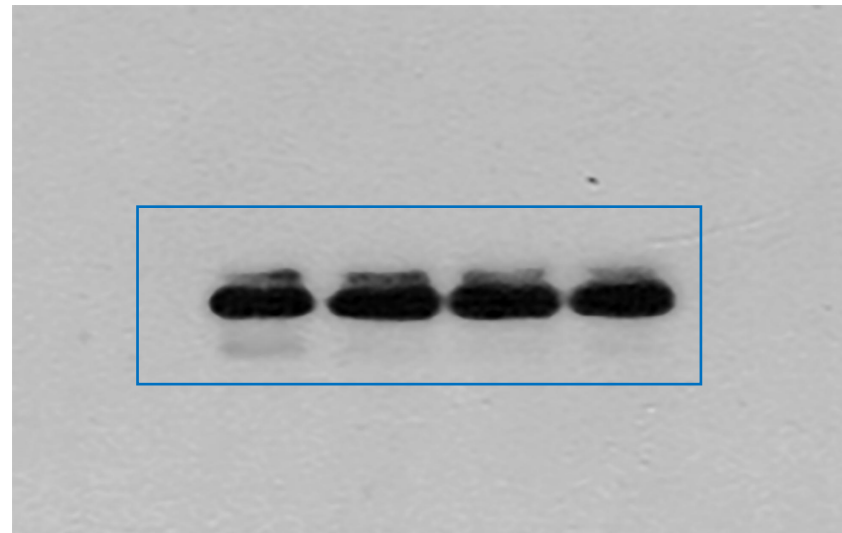

21 kDa

$\beta$ -actin

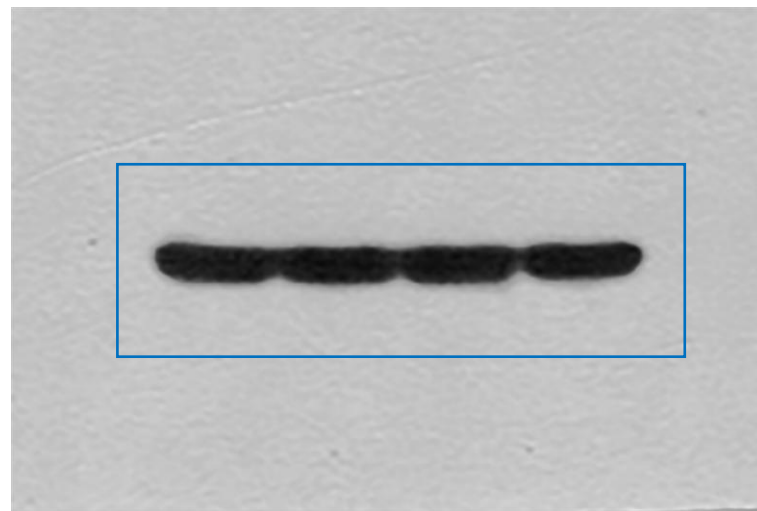

45 kDa

**Fig.S6**

**A**

RNF146 siRNA# (-, 1, 2, 3)

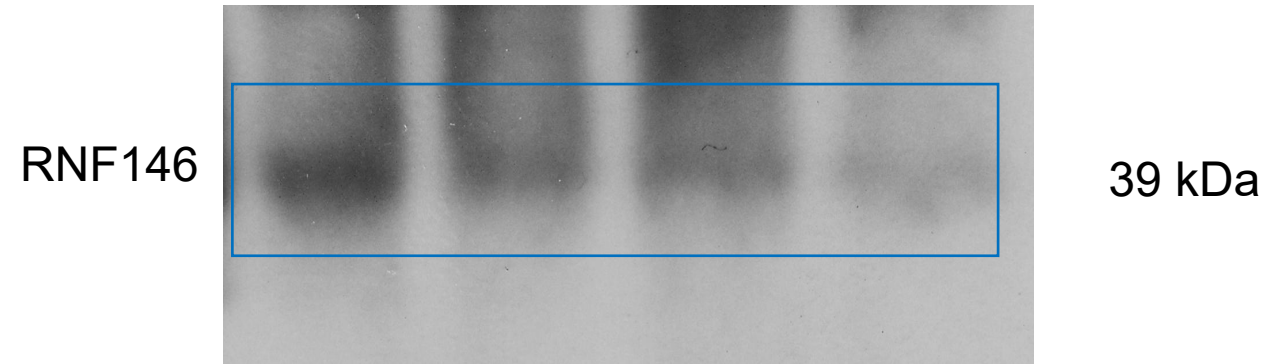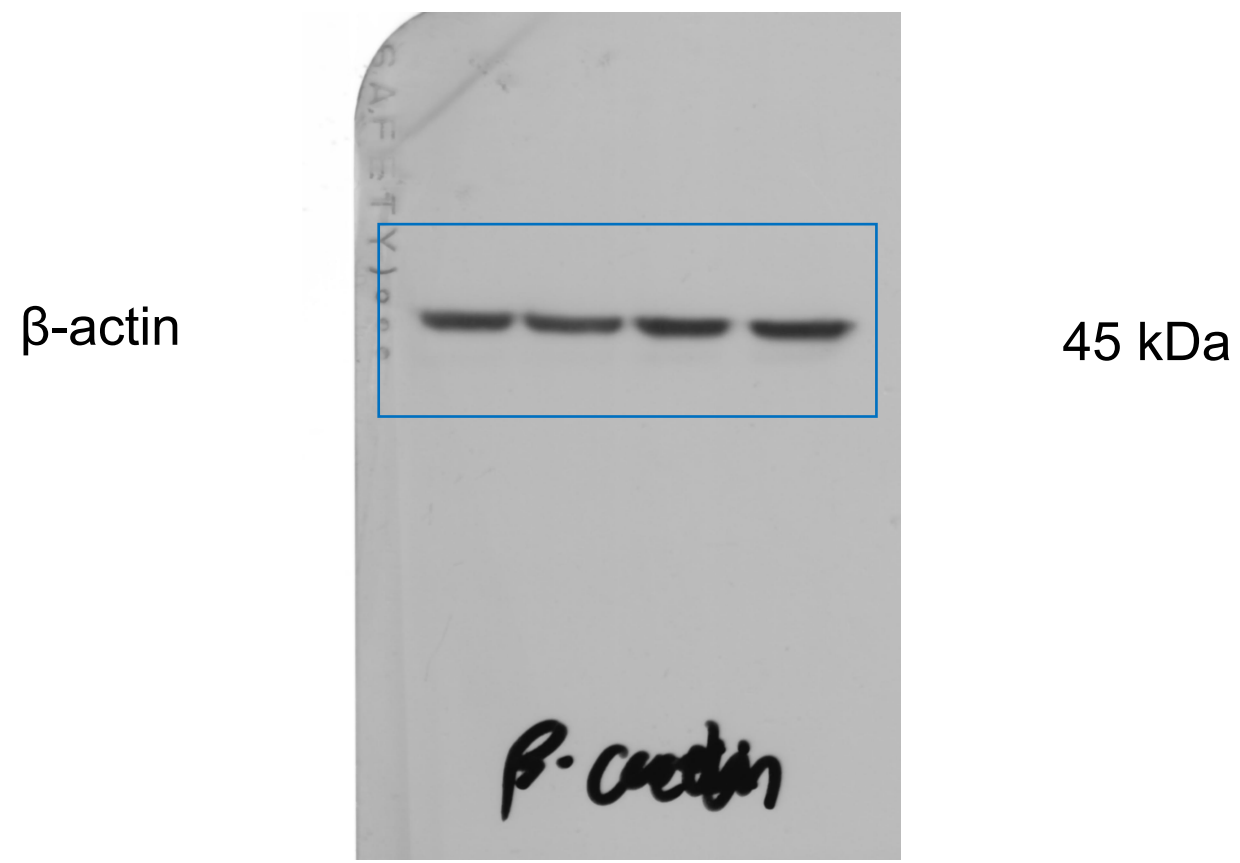

**B**

Crtl, MNNG, MNNG+NC siRNA

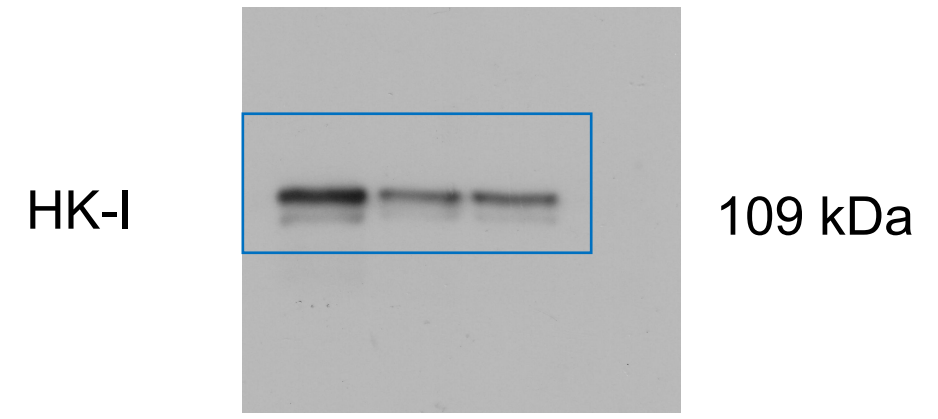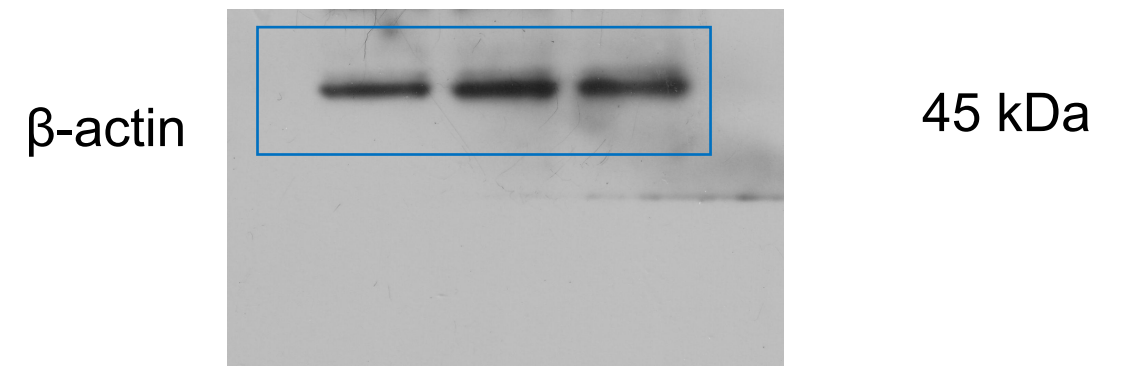

Fig. S7

**B** Ctrl. MCAO, MCAO+crocetin(20, 40 mg/kg).

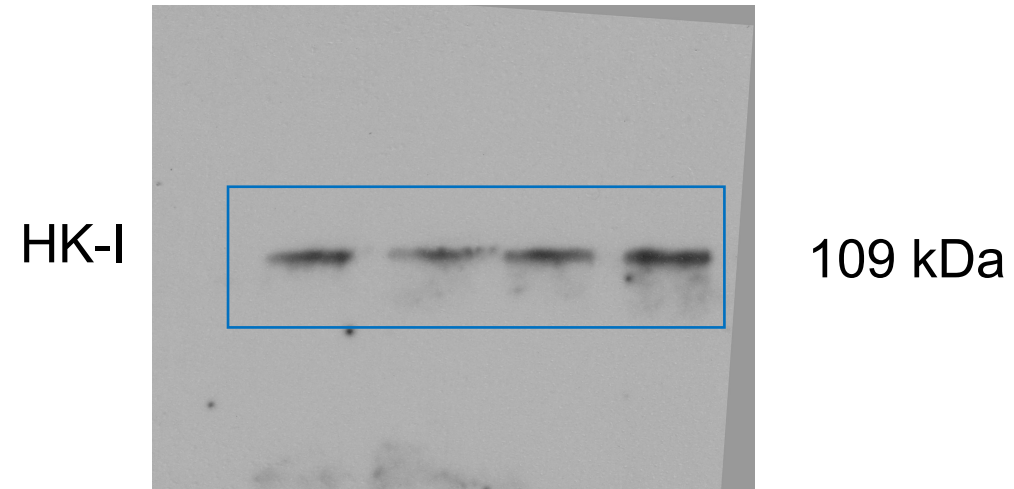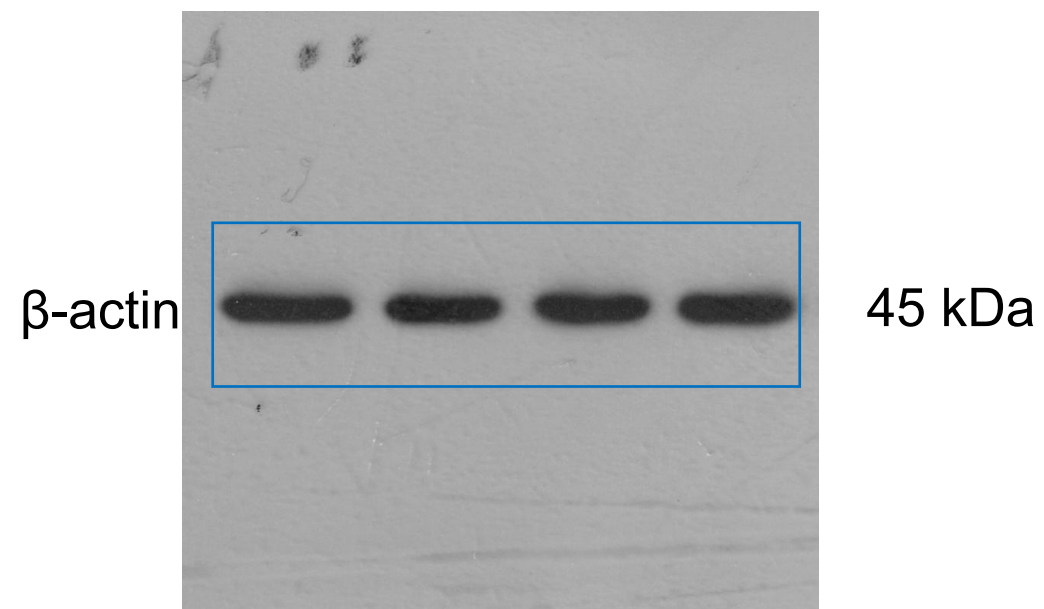

**C**

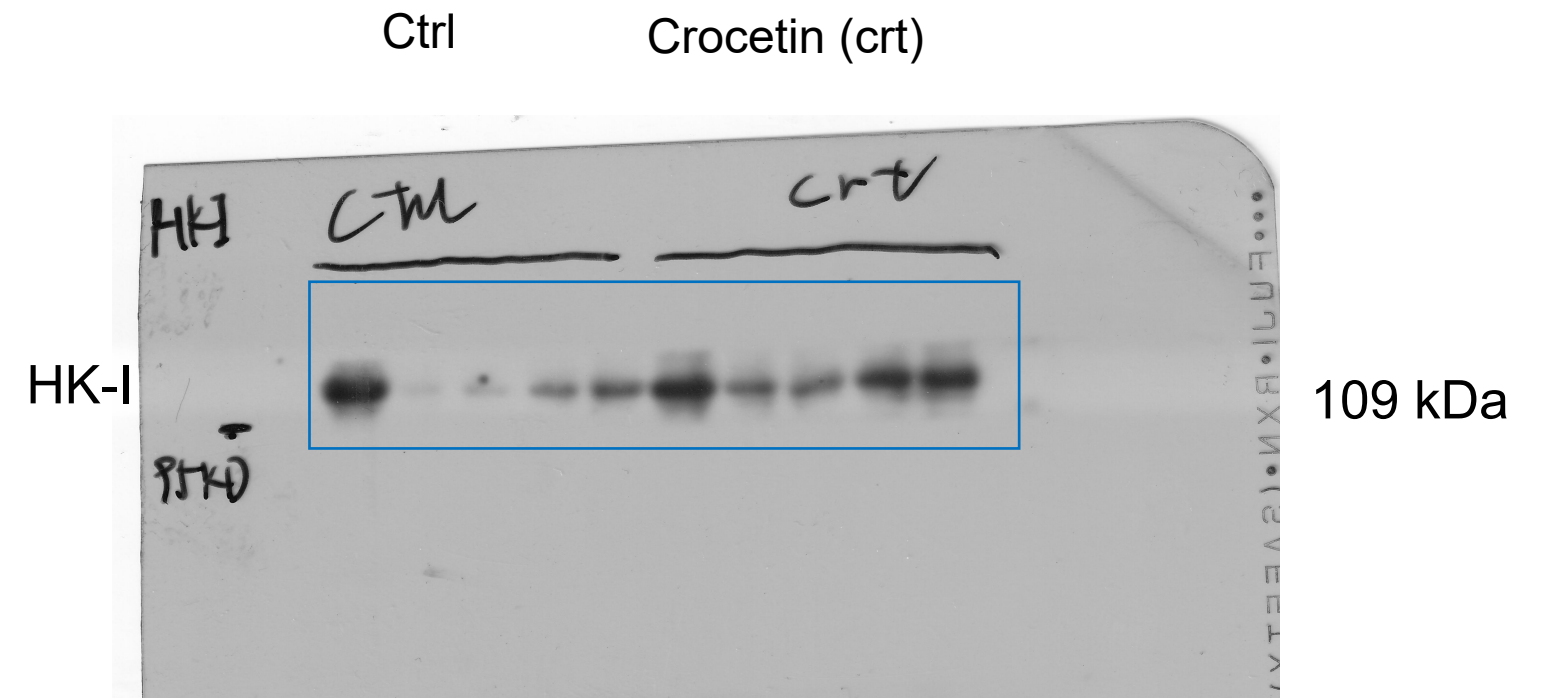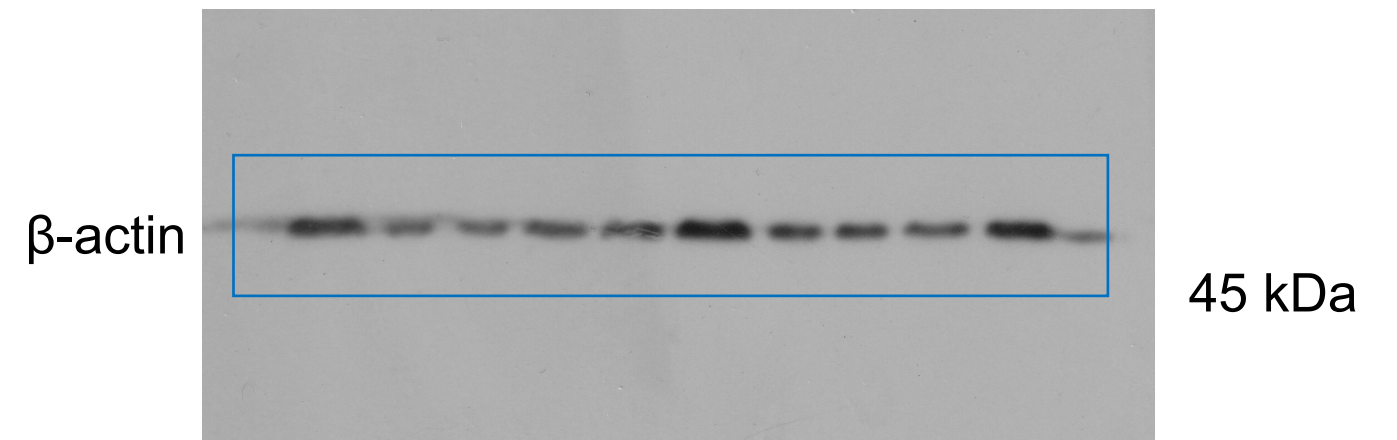

Supplement: 41419_2023_5581_MOESM10_ESM.pdf [file 41419_2023_5581_MOESM10_ESM.pdf]
